# Supplementary material for: Perylene with peripherally fused pyrrole and pyridine: columnar packing, anti-Kasha dual emission and reactive oxygen species generation
Source: Royal Society of Chemistry journal article supplement (doi:10.1039/d4nj01177e), 2024-01-01
Supplement: d4nj01177e1.pdf [file d4nj01177e1.pdf]

# Pyrrole and Pyridine Peripherally Fused Perylene: Columnar Packing, Anti-kasha Dual Emission and Reactive Oxygen Species Generation

(Supporting Information)

Jing Cao,<sup>a</sup> Wenhao Zhang,<sup>a</sup> Yeda Ding,<sup>a</sup> Xuejin Zhang,<sup>a</sup> Yuanyuan Zhang,<sup>a</sup> Dan Qiao,<sup>a</sup> Shumin Biao,<sup>a</sup> Xuefei Dong,<sup>a</sup> Jiayi Song,<sup>a</sup> Gaole Dai,<sup>\*b</sup> Ruiguo Zhao,<sup>\*a</sup> Qing Wang<sup>\*a</sup>

<sup>a</sup>School of Chemistry and Chemical Engineering, Inner Mongolia University, 235 West University Street, Hohhot 010021, China

Email: [zhaoruig@imu.edu.cn](mailto:zhaoruig@imu.edu.cn) [qingwang@imu.edu.cn](mailto:qingwang@imu.edu.cn)

<sup>b</sup> College of Material Chemistry and Chemical Engineering, Key Laboratory of Organosilicon Chemistry and Material Technology, Ministry of Education, Hangzhou Normal University, Hangzhou 311121, Zhejiang, P. R. China

Email: [daigaole@hznu.edu.cn](mailto:daigaole@hznu.edu.cn)

## 1. Experimental Section

### Table of Contents

|                                                                                      |    |
|--------------------------------------------------------------------------------------|----|
| 1. Experimental Section .....                                                        | 1  |
| 1.1 General .....                                                                    | 1  |
| 1.2 Synthetic procedures and characterization data .....                             | 2  |
| 2. Reactive oxygen species (ROS) .....                                               | 6  |
| 3. Photoelectrical properties .....                                                  | 6  |
| 4. DFT calculations .....                                                            | 15 |
| 5. Crystal information .....                                                         | 24 |
| 6. Appendix: <sup>1</sup> H/ <sup>13</sup> C NMR , HRMS spectra and IR spectra ..... | 27 |
| 7. Reference .....                                                                   | 36 |

### 1.1 General

All reagents were purchased from commercial sources without further purification. <sup>1</sup>H and <sup>13</sup>C NMR spectra were recorded using Bruker Advance II 500 MHz or 600 MHz spectrometer in CDCl<sub>3</sub> or MeOD with tetramethylsilane (TMS) as the internal standard. The chemical shift was recorded in ppm and the following abbreviations were used to explain the multiplicities: s = singlet, d = doublet, t = triplet, m = multiplet, br = broad. APCI and ESI mass spectra were recorded on a SHIMADZU/LCMS-IT-TOF instrument. UV-Vis-NIR absorption was recorded on a SHIMADZU UV-2600i spectrophotometer. Steady-state photoluminescence (PL) spectra were recorded on a HITACHI F-4700 spectrophotometer. Absolute PL quantum yield was measured on a HAMAMATSU C11347-11 spectrometer. Cyclic voltammetry measurements were performed in dry dichloromethane (DCM) and tetrahydrofuran (THF) on a CHI 620C electrochemical analyzer with a three-electrode cell, using 0.1 M Bu<sub>4</sub>NPF<sub>6</sub> as supporting electrolyte, AgCl/Ag as reference electrode, gold disk as working electrode (2 mm diameter, polished with a polishing cloth containing Al<sub>2</sub>O<sub>3</sub> powder (particle size 0.05 μm)), Pt as counter electrode. Analyte concentration is 7\*10<sup>-4</sup> M, and the solution was deaerated with bubbling argon prior measurement. The initial potential is 0.00 V, and sweeps in a positive direction with a scan rate of 100 mV/s at room temperature. Potential was externally calibrated against the ferrocene/ferrocenium couple. The single

crystal was measured at low temperature ( $T = 193\text{ K}$ ) on a Bruker D8 VENTURE Metaljet PHOTON II diffractometer. IR spectra were recorded on Thermo Scientific Nicolet iS20. Melting points were determined with melting points apparatus and are uncorrected.

## 1.2 Synthetic procedures and characterization data

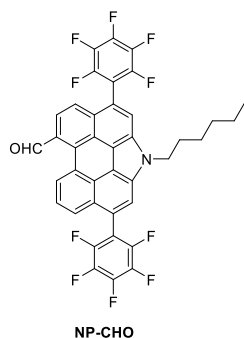

To a suspension of **NP**<sup>[1]</sup> (500 mg, 0.73 mmol) in dry  $\text{CH}_2\text{Cl}_2$  (15 mL),  $\text{SnCl}_4$  (0.26 mL, 2.22 mmol) was added in one portion at  $0^\circ\text{C}$  under argon atmosphere, and then  $\text{Cl}_2\text{CHOCH}_3$  (0.2 mL, 2.21 mmol) was added dropwise over 1 h. The reaction mixture was stirred for additional 1 h at  $0^\circ\text{C}$  and then slowly warmed up to room temperature and then refluxed for 3 h. After cooling, water (100 mL) was added to quench the reaction and the organic layer was separated, washed by water, and dried over sodium sulfate. Solvent was removed under vacuum, and the residue was purified by column chromatography (silica gel, hexane/ethyl acetate = 20:1 v/v  $R_f = 0.30$ ) to afford the pure product **NP-CHO** as orange solid (260 mg, 50% yield);  $^1\text{H NMR}$  (600 MHz,  $\text{CDCl}_3$ )  $\delta$  (ppm) = 11.06 (s, 1H), 8.50 (d,  $J = 7.3\text{ Hz}$ , 1H), 8.35 (d,  $J = 8.5\text{ Hz}$ , 1H), 8.04 (s, 1H), 7.99 – 7.93 (m, 3H), 7.87 (d,  $J = 8.6\text{ Hz}$ , 1H), 4.83 (t,  $J = 7.1\text{ Hz}$ , 2H), 2.19 – 2.14 (m, 2H), 1.47 – 1.42 (m, 2H), 1.38 – 1.33 (m, 2H), 1.30 – 1.24 (m, 2H), 0.83 (t,  $J = 7.3\text{ Hz}$ , 3H);  $^{13}\text{C NMR}$  (151 MHz,  $\text{CDCl}_3$ )  $\delta$  (ppm) = 192.06, 145.01 (d,  $J_{F-C} = 255.4\text{ Hz}$ ), 141.18 (d,  $J_{F-C} = 255.4\text{ Hz}$ ), 138.01 (d,  $J_{F-C} = 251.0\text{ Hz}$ ), 132.93, 132.78, 132.52, 131.89, 130.54, 129.59, 128.38, 127.26, 125.78, 125.00, 124.95, 124.69, 123.04, 121.88, 120.37, 118.06, 117.98, 117.79, 116.52, 114.84 (d,  $J_{F-C} = 38.7, 18.9\text{ Hz}$ ), 46.24, 31.37, 31.25, 26.94, 22.48, 13.85. 35 carbons are expected, but 30 carbons show up in C-NMR spectrum, which maybe ascribe to signal overlap or low intensity due to F coupling. IR (KBr,  $\text{cm}^{-1}$ ) 2929.87, 2855.33, 1681.86, 1548.09, 1523.50, 1492.09, 1370.04, 1355.74, 1307.03, 1260.52, 1214.35, 1184.81, 1105.49, 1082.58, 1018.21, 1005.18, 983.19, 903.65, 875.65, 793.04, 776.42, 761.69, 721.97, 663.24. mp  $165^\circ\text{C}$ . HRMS (APCI, positive mode):  $m/z$  ( $\text{M}+\text{H}$ )<sup>+</sup> calcd for  $\text{C}_{39}\text{H}_{21}\text{F}_{10}\text{NO}$  710.1541; found: 710.1538 (error: -0.42 ppm).

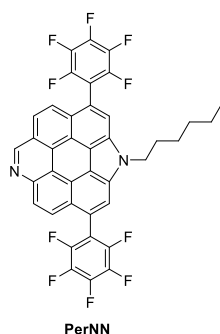

Trifluoroacetic acid (TFA) (1.0 mL), azidotrimethylsilane (TMSN<sub>3</sub>) (1.14 g, 9.89 mmol) and trifluoromethanesulfonic acid (TfOH) (0.68 g, 4.52 mmol) were added sequentially into a 25 mL two-neck flask containing **NP-CHO** (50 mg, 0.07 mmol) under air. The resulting solution was stirred in oil bath at 60°C for 1 h. The reaction mixture was then diluted with ethyl acetate, washed with aqueous NaOH (2 M, 5 mL), and dried over anhydrous Na<sub>2</sub>SO<sub>4</sub>. Solvents were removed under vacuum. The crude product was further purified by flash column chromatography (silica gel, hexane/ethyl acetate = 6:1 v/v R<sub>f</sub> = 0.45) to give powder compound **PerNN** as faint yellow solid (19.05 mg, 38% yield); <sup>1</sup>H NMR (600 MHz, CDCl<sub>3</sub>) δ (ppm) = 10.28 (s, 1H), 8.86 (d, *J* = 8.4 Hz, 1H), 8.71 (d, *J* = 8.8 Hz, 1H), 8.51 (d, *J* = 8.5 Hz, 1H), 8.48 (s, 1H), 8.41 (s, 1H), 8.39 (d, *J* = 9.1 Hz, 1H), 5.06 (t, *J* = 6.8 Hz, 2H), 2.35 – 2.30 (m, 2H), 1.56 – 1.51 (m, 2H), 1.42 – 1.37 (m, 2H), 1.31 – 1.28 (m, 2H), 0.84 (t, *J* = 7.2 Hz, 3H); <sup>13</sup>C NMR (151 MHz, CDCl<sub>3</sub>) δ (ppm) = 149.82, 144.98 (d, *J*<sub>F-C</sub> = 246.5 Hz), 143.98, 141.21 (d, *J*<sub>F-C</sub> = 256.7 Hz), 138.09 (d, *J*<sub>F-C</sub> = 252.7 Hz), 135.89, 135.47, 126.39, 125.99, 124.90, 124.02, 123.72, 122.89, 121.71, 120.70, 120.45, 119.66, 118.70, 118.33, 116.22, 115.30 (d, *J*<sub>F-C</sub> = 15.9 Hz), 114.85, 47.03, 31.43, 31.22, 27.01, 22.48, 13.88. 35 carbons are expected, but 28 carbons show up in C-NMR spectrum, which maybe ascribe to signal overlap or low intensity due to F coupling. IR (KBr, cm<sup>-1</sup>) 2929.36, 2856.15, 1689.06, 1650.38, 1595.73, 1562.11, 1521.52, 1485.63, 1453.73, 1406.89, 1336.62, 1314.96, 1294.08, 1100.48, 1051.70, 1013.03, 986.32, 899.25, 866.81, 826.42, 813.10, 792.68, 726.62, 660.07, 490.31. mp 225°C. HRMS (APCI, positive mode): *m/z* (M+H)<sup>+</sup> calcd for C<sub>39</sub>H<sub>20</sub>F<sub>10</sub>N<sub>2</sub> 707.1545 ; found: 707.1530 (error: -2.12 ppm).

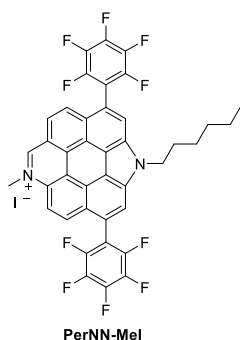

**PerNN** (20 mg, 0.028 mmol) was dissolved in dry MeCN (1 mL) and heated to 90°C for 0.5 h under nitrogen atmosphere until it was fully dissolved. Iodomethane (1 mL, 16.1 mmol) was subsequently added, and the reaction mixture was stirred at 9°C for overnight. After being cooled to room temperature, the solvent was removed by evaporation, and the residue was purified by flash column chromatography (silica gel, DCM/methyl alcohol = 20:1 v/v R<sub>f</sub> = 0.14) to give powder compound **PerNN-Mel** as yellow solid (16.14 mg, 79% yield); <sup>1</sup>H NMR (600 MHz, MeOD) δ (ppm) = 10.69 (s, 1H), 9.24 (s, 1H), 9.14 - 9.12 (m, 3H), 9.05 (d, *J* = 8.9 Hz, 1H), 8.86 (d, *J* = 8.7 Hz, 1H), 5.35 (t, *J* = 6.6 Hz, 2H), 5.29 (s, 3H), 2.40 – 2.35 (m, 2H), 1.50 – 1.44 (m, 2H), 1.40 – 1.35 (m, 2H), 1.30 – 1.28 (m, 2H), 0.77 (t, *J* = 7.2 Hz, 3H); <sup>13</sup>C NMR (151 MHz, MeOD) δ (ppm) = 147.57, 145.11 (d, *J*<sub>F-C</sub> = 240.0 Hz), 141.75 (d, *J*<sub>F-C</sub> = 262.0 Hz), 138.12 (t, *J*<sub>F-C</sub> = 127.4 Hz), 137.81, 136.21, 135.02, 131.03, 128.26, 127.17, 124.22, 122.83, 122.52, 122.14, 120.86, 118.58, 118.24, 118.08, 117.50, 117.01, 116.74, 114.89, 114.03 (t, *J*<sub>F-C</sub> = 18.6 Hz), 114.03, 45.13, 31.09, 30.92, 26.46, 22.09, 12.69. 36 carbons are expected, but 30 carbons show up in C-NMR spectrum, which maybe ascribe to signal overlap or low intensity due to F coupling. IR (KBr, cm<sup>-1</sup>) 2920.90, 2850.79, 1730.30, 1686.88, 1652.39, 1599.33, 1576.69, 1522.77, 1496.59, 1453.94,

1380.94, 1336.91, 1317.04, 1294.38, 1262.02, 1214.33, 1180.40, 1154.90, 1098.72, 1051.82, 1031.09, 1013.26, 988.05, 878.05, 817.09, 790.99, 744.56, 681.30, 665.22, 638.12, 577.52, 491.03. mp 166°C. HRMS (ESI, positive mode):  $m/z$   $M^+$  calcd for  $C_{40}H_{23}F_{10}N_2^+$  721.1696 ; found: 721.1675 (error: -2.91 ppm).

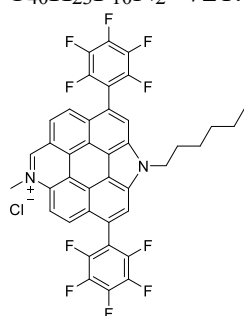

PerNN-MeCl

**PerNN-MeI** (16.14 mg, 0.022 mmol) solid was redissolved in methanol (3 mL). Aqueous solution (0.5 mL) of  $NH_4PF_6$  (17.93 mg, 0.11 mmol.) was added followed by addition of water (5 mL). The resulting precipitate was filtrated, dried and redissolved in MeCN (1.2 mL). A MeCN solution (0.5 mL) of tetrabutylammonium chloride (30.57 mg, 0.11 mmol.) was added, and the reaction mixture was stirred 1 min. After reaction completion, solvent was removed by evaporation. The crude product was purified by flash column chromatography (silica gel, DCM/methanol = 20:1 v/v  $R_f$  = 0.15) to give oily curde product. The oil mixture was then dissolved in DCM, and the organic layer was separated and washed by water, dried over sodium sulfate. Finally, solvent was removed under vacuum, and the residue was washed by hexane to give **PerNN-MeCl** as yellow solid (12.11 mg, 75% yield);  $^1H$  NMR (600 MHz,  $CDCl_3$ )  $\delta$  (ppm) = 12.52 (s, 1H), 9.42 (d,  $J$  = 8.4 Hz, 1H), 8.96 (m, 2H), 8.81 (s, 1H), 8.72 (s, 1H), 8.69 (d,  $J$  = 8.1 Hz, 1H), 5.66 (s, 3H), 5.20 (t,  $J$  = 6.8 Hz, 2H), 2.43 – 2.35 (m, 2H), 1.66 – 1.61 (m, 2H), 1.44 – 1.39 (m, 2H), 1.31 – 1.29 (m, 2H), 0.84 (d,  $J$  = 7.2 Hz, 3H);  $^{13}C$  NMR (126 MHz,  $CDCl_3$ )  $\delta$  (ppm) = 150.32, 144.86 (d,  $J_{F-C}$  = 243.6 Hz), 141.80 (d,  $J_{F-C}$  = 252.7 Hz), 138.22 (d,  $J_{F-C}$  = 255.8 Hz), 137.59, 135.97, 134.55, 130.97, 128.43, 127.56, 127.18, 126.23, 124.14, 122.91, 122.81, 122.61, 119.90, 118.87, 118.57, 118.18, 117.80, 117.62, 117.41, 114.61, 113.79 (d,  $J_{F-C}$  = 2.1 Hz), 45.84, 31.38, 31.34, 27.02, 22.44, 13.86. 36 carbons are expected, but 31 carbons show up in C-NMR spectrum, which maybe ascribe to signal overlap or low intensity due to F coupling. IR (KBr,  $cm^{-1}$ ) 2922.25, 2852.03, 1655.58, 1602.04, 1522.88, 1494.81, 1379.42, 1317.13, 1294.61, 1263.32, 1212.91, 1153.17, 1099.67, 1014.54, 986.90, 883.60, 819.61, 789.33, 683.67, 583.35, 488.95. mp 148°C. HRMS (ESI, positive mode):  $m/z$   $M^+$  calcd for  $C_{40}H_{23}F_{10}N_2^+$  721.1696 ; found: 721.1689 (error: -0.97 ppm).

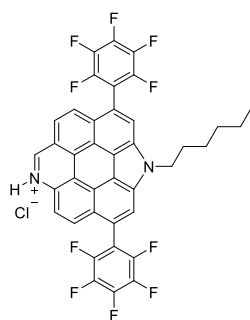

PerNN-H

**PerNN** (20 mg, 0.028 mmol) was dissolved in DCM (1 mL) and 2.6 ul HCl (12 M) was added dropwise, and the reaction mixture was stirred for 30 min. After reaction

completion, solvent was removed by evaporation, and the residue was washed by hexane to give compound **PerNN-H** as yellow solid (20 mg, 100% yield);  $^1\text{H}$  NMR (600 MHz,  $\text{CDCl}_3$ )  $\delta$  (ppm) = 10.43 (s, 1H), 9.00 (d,  $J = 8.9$  Hz, 1H), 8.78 (d,  $J = 8.9$  Hz, 1H), 8.67 (s, 1H), 8.63 (d,  $J = 8.9$  Hz, 1H), 8.56 (s, 1H), 8.53 (d,  $J = 8.8$  Hz, 1H), 5.15 (t,  $J = 6.9$  Hz, 2H), 2.38 – 2.32 (m, 2H), 1.56 – 1.51 (m, 2H), 1.43 – 1.38 (m, 2H), 1.32 – 1.28 (m, 2H), 0.84 (t,  $J = 7.2$  Hz, 3H);  $^{13}\text{C}$  NMR (151 MHz,  $\text{CDCl}_3$ )  $\delta$  (ppm) = 160.41, 144.94 (d,  $J_{\text{F-C}} = 243.7$  Hz), 142.37, 138.11 (d,  $J_{\text{F-C}} = 125.2$  Hz), 137.78, 136.46, 133.81, 131.25, 129.73, 127.50, 127.31, 124.70, 124.62, 123.15, 122.75, 122.09, 119.97, 118.58, 118.29, 117.89, 117.57, 117.23, 115.39, 113.50, 112.97 (d,  $J_{\text{F-C}} = 165.2$  Hz), 47.62, 31.33, 27.01, 22.43, 13.80. 35 carbons are expected, but 30 carbons show up in C-NMR spectrum, which maybe ascribe to signal overlap or low intensity due to F coupling. IR (KBr,  $\text{cm}^{-1}$ ) 2924.82, 2851.59, 1730.35, 1690.45, 1597.94, 1522.94, 1485.50, 1383.77, 1338.01, 1317.95, 1295.85, 1196.88, 1140.18, 1101.01, 1052.92, 1013.86, 987.81, 899.28, 877.46, 812.60, 793.08, 753.77, 719.36, 688.79, 662.02, 611.07, 580.29, 553.57, 489.96. HRMS (ESI, positive mode):  $m/z$   $\text{M}^+$  calcd for  $\text{C}_{39}\text{H}_{21}\text{F}_{10}\text{N}_2^+$  707.1540 ; found: 707.1550 (error: 1.41 ppm).

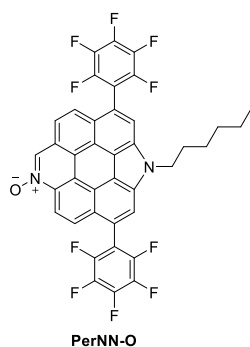

**PerNN-O**  
*m*-Chloroperbenzoic acid (*m*-CPBA) (19.55 mg, 0.11 mmol) was added in a solution of **PerNN** (20 mg, 0.028 mmol) in  $\text{CH}_2\text{Cl}_2$  (2.3 mL) at  $0^\circ\text{C}$ . The reaction mixture was stirred for 90 min at  $0^\circ\text{C}$ , then stirred at room temperature for overnight. After being concentrated under reduced pressure, the crude product was purified by flash column chromatography (silica gel,  $\text{DCM}/\text{methanol} = 30:1$  v/v  $R_f = 0.33$ ) to give **PerNN-O** as yellow solid (11.25 mg, 55% yield);  $^1\text{H}$  NMR (600 MHz,  $\text{CDCl}_3$ )  $\delta$  (ppm) = 9.78 (s, 1H), 9.22 (d,  $J = 9.2$  Hz, 1H), 8.50 (d,  $J = 9.2$  Hz, 1H), 8.44 (s, 1H), 8.43 – 8.42 (m, 2H), 8.35 (d,  $J = 8.8$  Hz, 1H), 5.06 (t,  $J = 7.1$  Hz, 2H), 2.34 – 2.29 (m, 2H), 1.56 – 1.50 (m, 2H), 1.42 – 1.39 (m, 2H), 1.31 – 1.29 (m, 2H), 0.84 (t,  $J = 7.3$  Hz, 3H);  $^{13}\text{C}$  NMR (151 MHz,  $\text{CDCl}_3$ )  $\delta$  (ppm) = 144.91 (d,  $J_{\text{F-C}} = 247.3$  Hz), 141.32 (d,  $J_{\text{F-C}} = 245.6$  Hz), 137.85 (d,  $J_{\text{F-C}} = 125.9$  Hz), 137.35, 135.80, 135.75, 135.44, 126.63, 125.81, 124.68, 123.87, 123.79, 121.77, 121.65, 121.46, 119.81, 119.54, 119.37, 119.23, 118.31, 117.78, 116.89, 116.24, 115.92, 114.90 (d,  $J_{\text{F-C}} = 17.4$  Hz), 47.15, 31.40, 31.25, 29.70, 22.47, 13.87. 35 carbons are expected, but 31 carbons show up in C-NMR spectrum, which maybe ascribe to signal overlap or low intensity due to F coupling. IR (KBr,  $\text{cm}^{-1}$ ) 2922.62, 2851.68, 1688.44, 1650.10, 1595.32, 1565.05, 1521.30, 1487.81, 1401.43, 1338.34, 1303.21, 1262.46, 1188.37, 1105.67, 1083.89, 1051.61, 1012.55, 987.40, 869.47, 818.76, 790.71, 672.53, 627.84, 490.41. mp  $133^\circ\text{C}$ . HRMS (ESI, positive mode):  $m/z$   $(\text{M}+\text{H})^+$  calcd for  $\text{C}_{39}\text{H}_{20}\text{F}_{10}\text{N}_2\text{O}$  723.1494 ; found: 723.1488 (error: -0.83 ppm).

## 2. Reactive oxygen species (ROS)

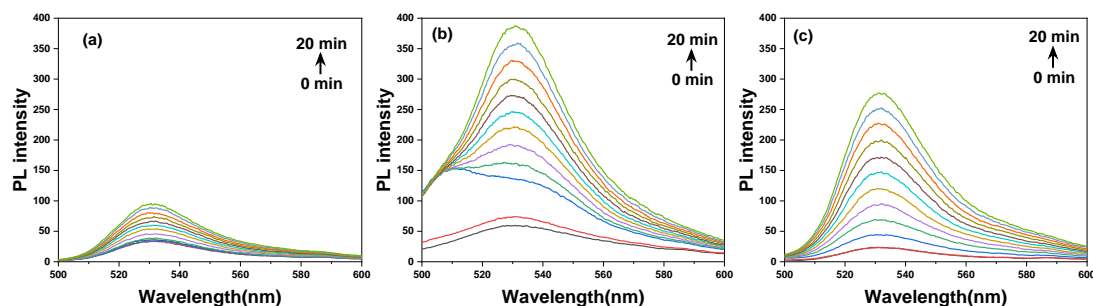

**Figure S1.** The fluorescence spectra changes of DCFH for ROS detection. (a) DCFH alone, (b) **PerNN**+DCFH and (c) **PerNN-O**+DCFH under white light with different irradiation time. Concentration of **PerNN** or **PerNN-O** is  $10^{-5}$  M; Light power:  $180 \text{ mW cm}^{-2}$ .

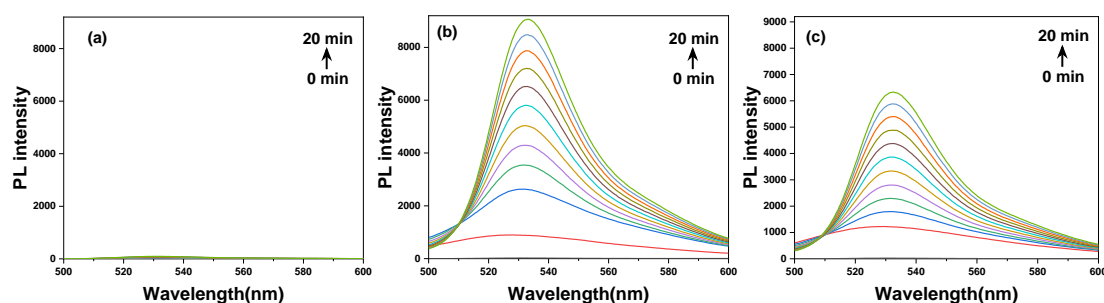

**Figure S2.** The fluorescence spectra changes of DCFH for ROS detection. (a) DCFH alone, (b) **PerNN-MeI**+DCFH and (c) **PerNN-MeCl**+DCFH under white light with different irradiation time. Concentration of **PerNN-MeI** or **PerNN-MeCl** is  $10^{-5}$  M; Light power:  $180 \text{ mW cm}^{-2}$ .

## 3. Photoelectrical properties

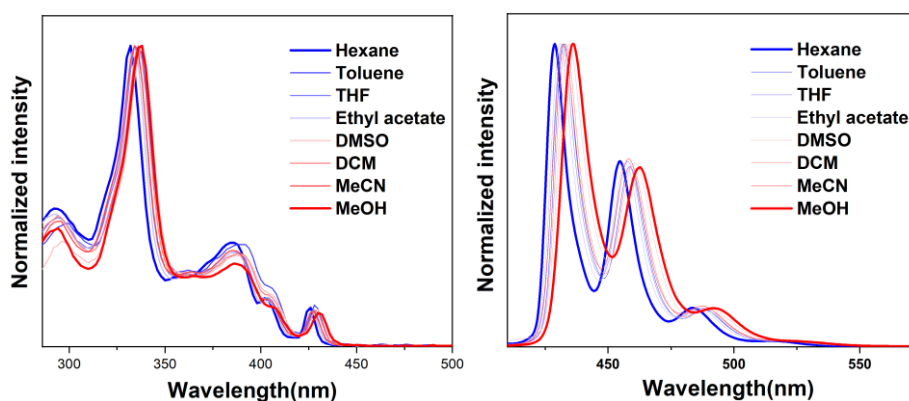

**Figure S3.** UV-vis absorption (left;  $10^{-5}$  M) and emission (right;  $10^{-5}$  M; excitation with 430 nm) spectra of **PerNN** in different solvents.

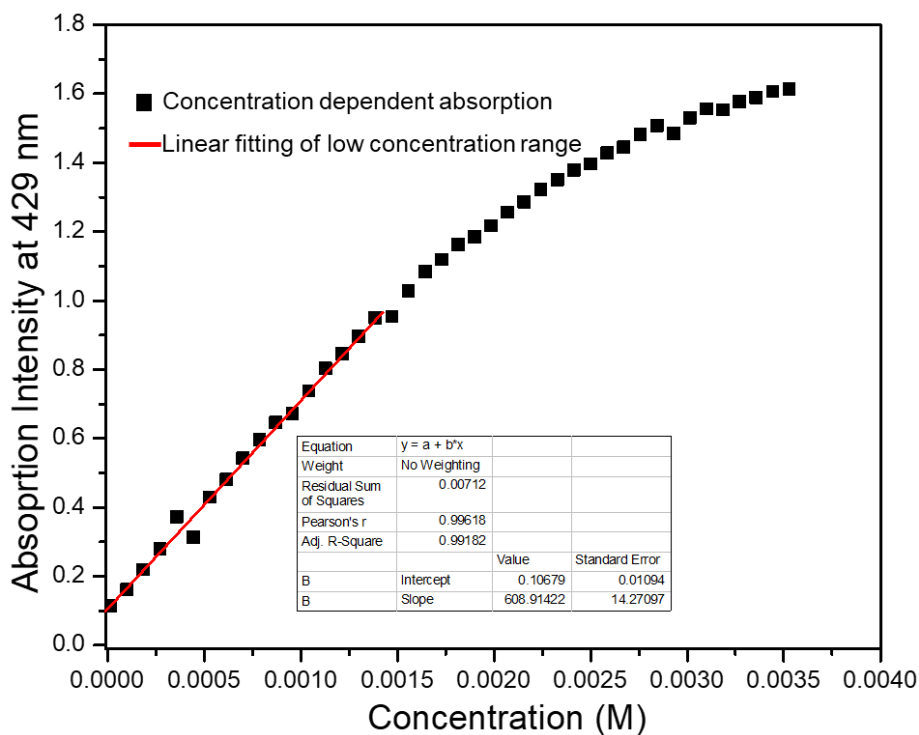

**Figure S4.** Concentration-dependent absorption intensity at 429 nm of PerNN in toluene.

**Table S1.** Summarize the photophysical properties of PerNN in different solvents.

| Solvent            | Hexane | Toluene | THF  | Ethyl acetate | DMSO  | DCM   | MeCN  | MeOH  | Powder |
|--------------------|--------|---------|------|---------------|-------|-------|-------|-------|--------|
| $\lambda_{abs}/nm$ | 425    | 427     | 427  | 425           | 429   | 427   | 427   | 429   |        |
| $\lambda_{eml}/nm$ | 428    | 432     | 432  | 431           | 434   | 434   | 432   | 437   |        |
| QY(%)              | 17.10  | 25.94   | 22.6 | 20.6          | 30.64 | 21.80 | 21.86 | 24.62 | 3.82   |

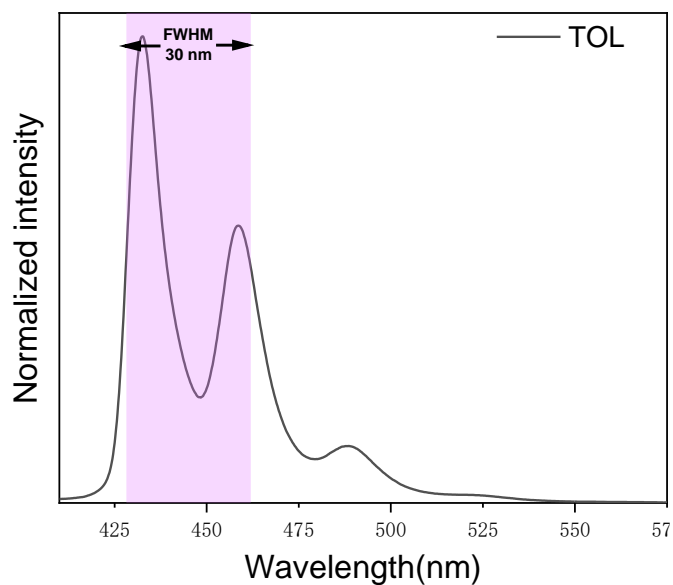

**Figure S5.** Full width at half maximum (FWHM) of PerNN in toluene.

**Table S2.** Full width at half maximum (FWHM) of **PerNN** in different solvents.

| solvent  | THF | Ethyl acetate | MeOH | DMSO | Toluene | DCM | MeCN | Hexane |
|----------|-----|---------------|------|------|---------|-----|------|--------|
| FWHM(nm) | 30  | 30            | 32   | 31   | 30      | 31  | 31   | 30     |

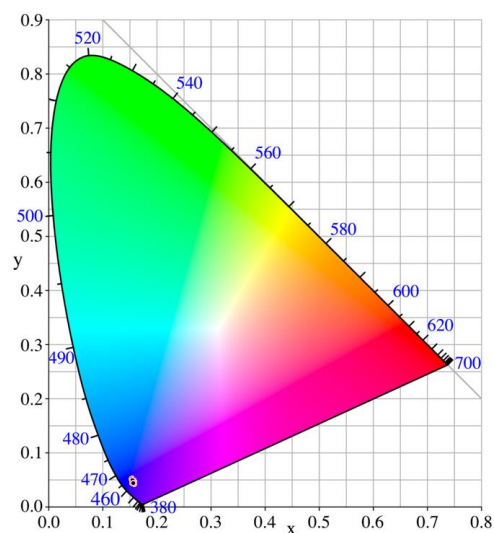

**Figure S6.** Fluorescent color coordinates in CIE 1931 chromaticity diagrams of **PerNN** in different solvents.

**Table S3.** Fluorescent color coordinates of **PerNN** in different solvents.

| solvent              | CIE x  | CIE y  |
|----------------------|--------|--------|
| <b>Toluene</b>       | 0.1547 | 0.044  |
| <b>Hexane</b>        | 0.1575 | 0.0424 |
| <b>MeCN</b>          | 0.1558 | 0.047  |
| <b>DCM</b>           | 0.1552 | 0.0479 |
| <b>MeOH</b>          | 0.1534 | 0.0522 |
| <b>THF</b>           | 0.1569 | 0.0476 |
| <b>DMSO</b>          | 0.1545 | 0.0492 |
| <b>Ethyl acetate</b> | 0.156  | 0.0445 |



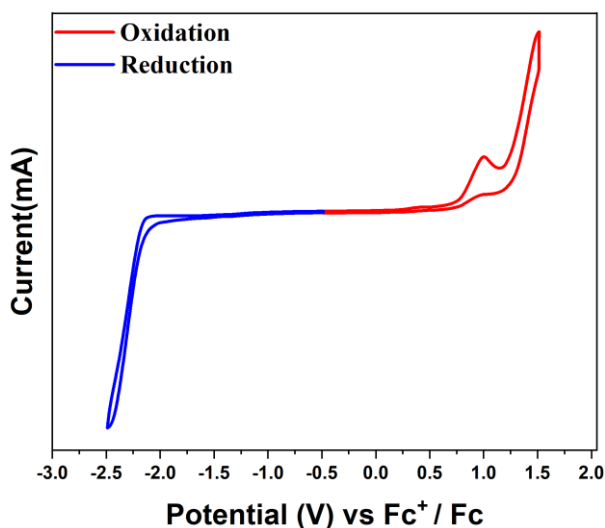

**Figure S7.** Cyclic voltammogram of **PerNN** in DCM with 0.1 M  $\text{Bu}_4\text{NPF}_6$  as a supporting electrolyte.

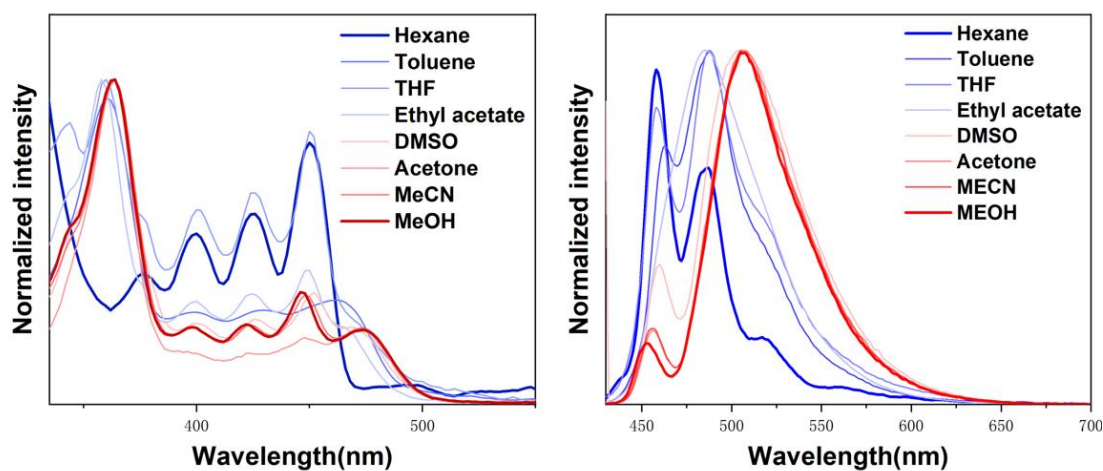

**Figure S8.** UV-vis absorption (left;  $10^{-5}$  M) and emission (right;  $10^{-5}$  M; excited with 420 nm) spectra of **PerNN-MeI** in different solvents.

**Table S4.** Summarize the photophysical properties of **PerNN-MeI** in different solvents.

| Solvent                          | Hexane | Toluene | THF   | Ethyl acetate | DMSO  | Acetone | MeCN  | MeOH  | Powder |
|----------------------------------|--------|---------|-------|---------------|-------|---------|-------|-------|--------|
| $\lambda_{\text{abs}}/\text{nm}$ | 450    | 463     | 450   | 466           | 470   | 472     | 474   | 474   |        |
| $\lambda_{\text{em}}/\text{nm}$  | 458    | 488     | 488   | 486           | 507   | 507     | 506   | 506   |        |
| QY(%)                            | 53.32  | 52.26   | 62.28 | 47.56         | 52.12 | 24.42   | 32.38 | 35.26 | 0.91   |

Note:  $\lambda_{\text{em}}$  denotes the maximum emission wavelength.

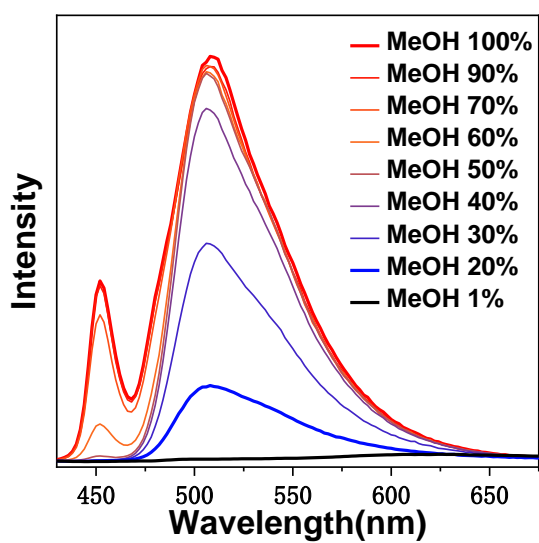

**Figure S9.** Emission spectra of **PerNN-MeI** in MeOH/water mixed solvents with different MeOH fraction.

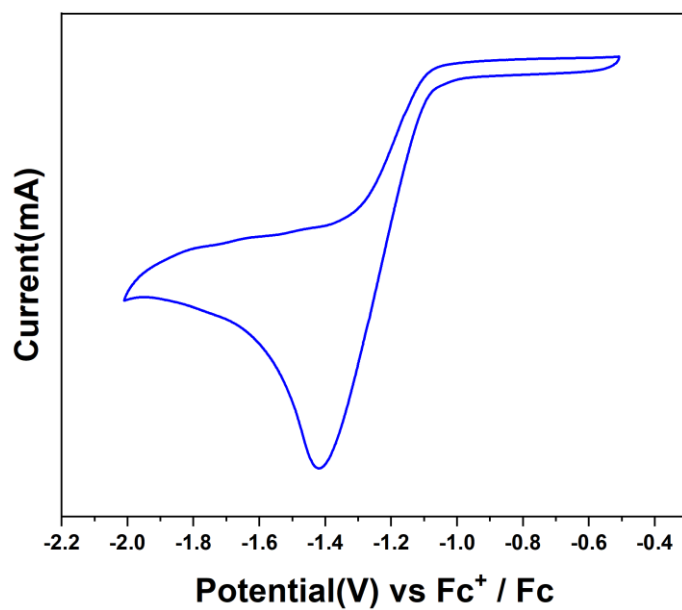

**Figure S10.** Cyclic voltammogram of **PerNN-MeI** in THF with 0.1 M  $\text{Bu}_4\text{NPF}_6$  as a supporting electrolyte.

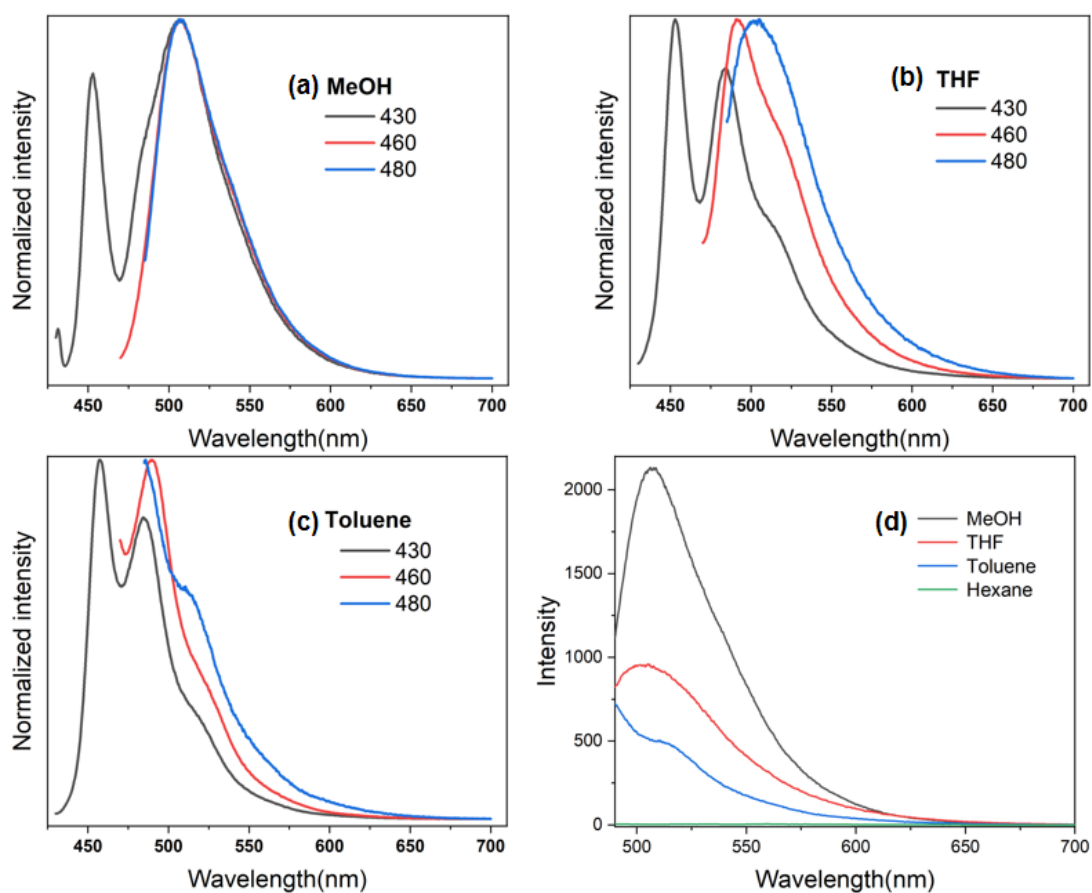

**Figure S11.** Excitation-dependant-emission spectra of **PerNN-MeI** in (a) MeOH (b) THF (c) Toluene; (d) Emission spectra of **PerNN-MeI** in four solvents when excited at 480 nm.

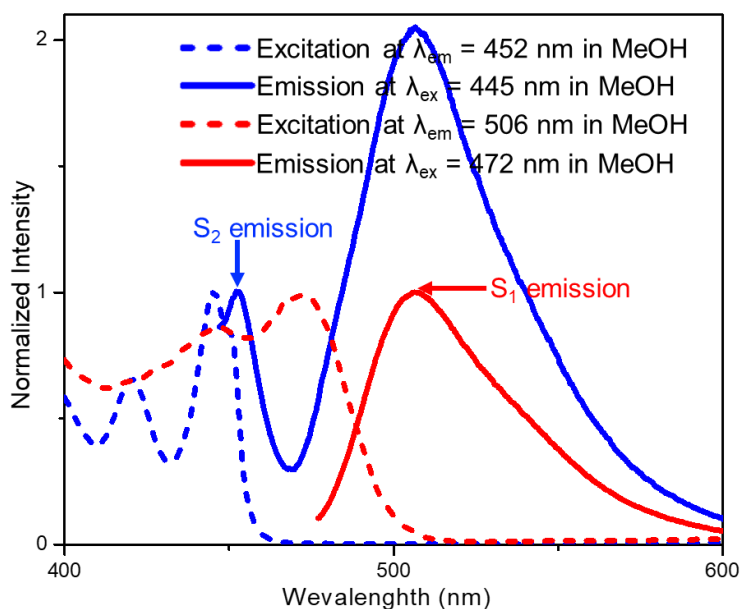

**Figure S12.** Excitation spectra (dotted line) and emission spectra (solid line) of **PerNN-MeI** in MeOH.

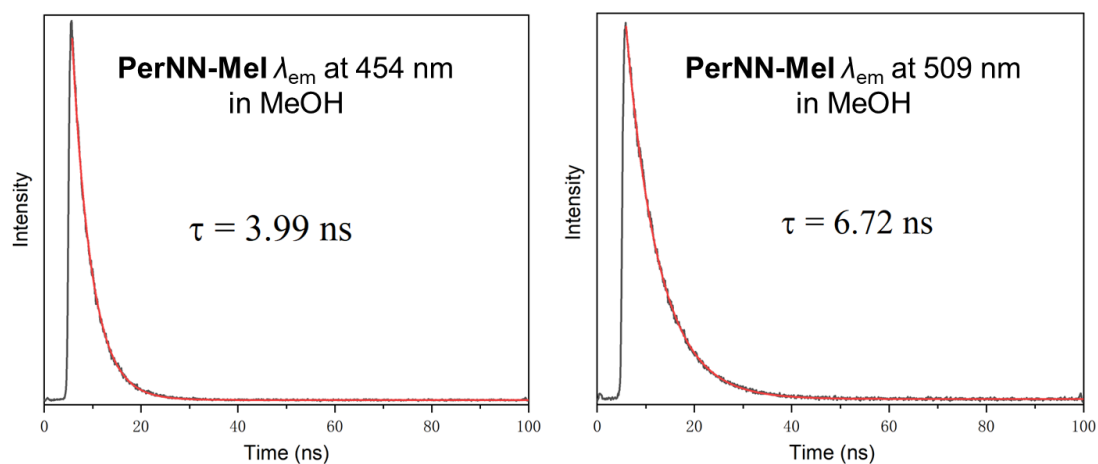

**Figure S13.** Fluorescence decay curves of **PerNN-MeI** recorded in MeOH solution, and their single-exponential fits. Experimental decay curves are shown in black, exponential fits are in red.

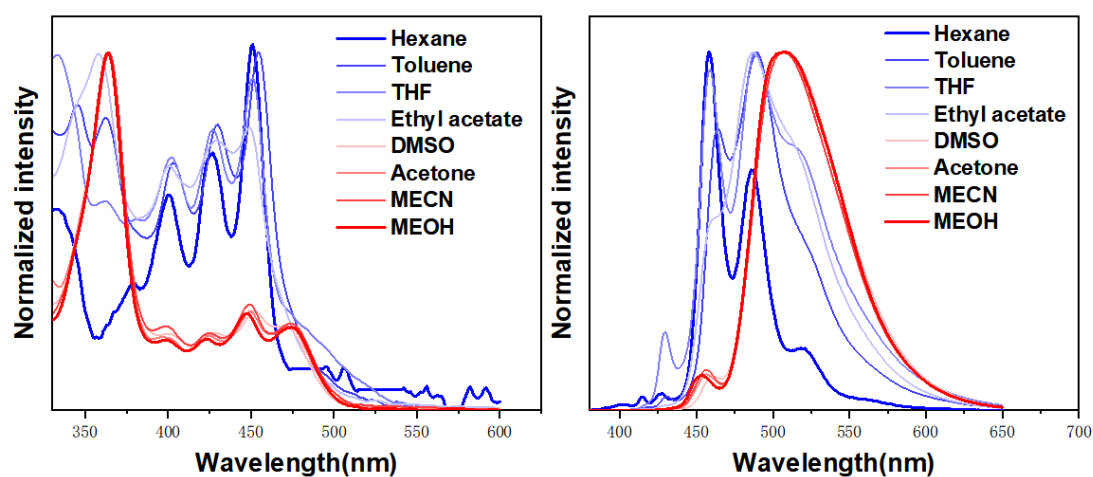

**Figure S14.** UV-vis absorption (left;  $10^{-5}$  M) and emission (right;  $10^{-5}$  M; excited with 370 nm) spectra of **PerNN-MeCl** in different solvents.

**Table S5.** Summarize the photophysical properties of **PerNN-MeCl** in different solvents.

| Solvent                          | Hexane | Toluene | THF   | Ethyl acetate | DMSO | Acetone | MeCN | MeOH  |
|----------------------------------|--------|---------|-------|---------------|------|---------|------|-------|
| $\lambda_{\text{abs}}/\text{nm}$ | 451    | 455     | 451   | 448           | 469  | 472     | 474  | 474   |
| $\lambda_{\text{em}}/\text{nm}$  | 459    | 490     | 488   | 488           | 509  | 507     | 507  | 507   |
| QY(%)                            | 55.00  |         | 39.78 |               |      |         |      | 35.10 |

Note:  $\lambda_{\text{em}}$  denotes the maximum emission wavelength.

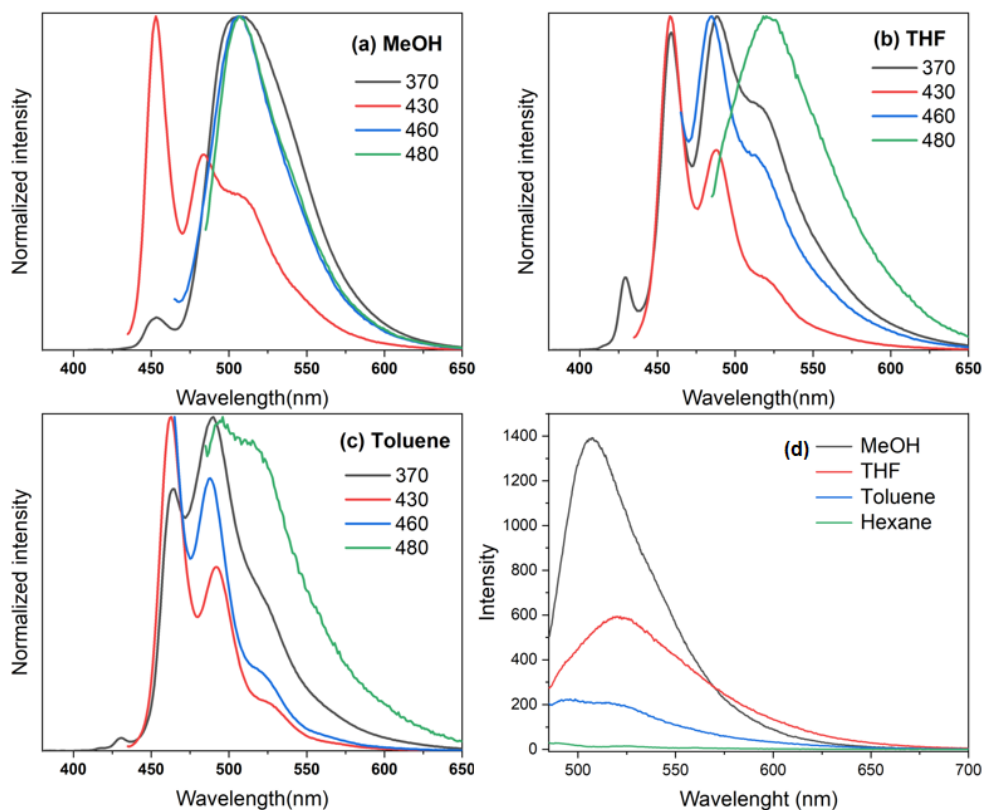

**Figure S15.** Excitation-dependant-emission spectra of **PerNN-MeCl** in (a) MeOH (b) THF (c) Toluene; (d) (d) Emission spectra of **PerNN-MeCl** in four solvents when excited at 480 nm.

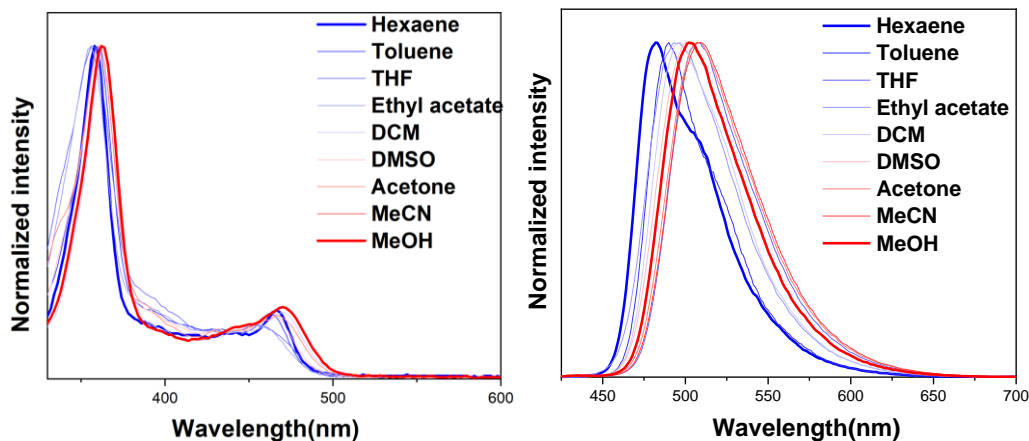

**Figure S16.** UV-vis absorption (left;  $10^{-5}$  M) and emission (right;  $10^{-5}$  M; excited with 420 nm) spectra of **PerNN-H** in different solvents.

**Table S6.** Summarize the photophysical properties of **PerNN-H** in different solvents.

| Solvent                          | Hexane | Toluene | THF   | Ethyl acetate | DCM   | DMSO  | Acetone | MeCN  | MeOH  | Powder |
|----------------------------------|--------|---------|-------|---------------|-------|-------|---------|-------|-------|--------|
| $\lambda_{\text{abs}}/\text{nm}$ | 465    | 462     | 455   | 453           | 469   | 463   | 467     | 469   | 467   |        |
| $\lambda_{\text{em}}/\text{nm}$  | 481    | 489     | 507   | 494           | 496   | 501   | 507     | 508   | 503   |        |
| QY(%)                            | 33.23  | 38.93   | 33.06 | 32.29         | 23.90 | 36.56 | 35.17   | 33.78 | 38.20 | 4.40   |

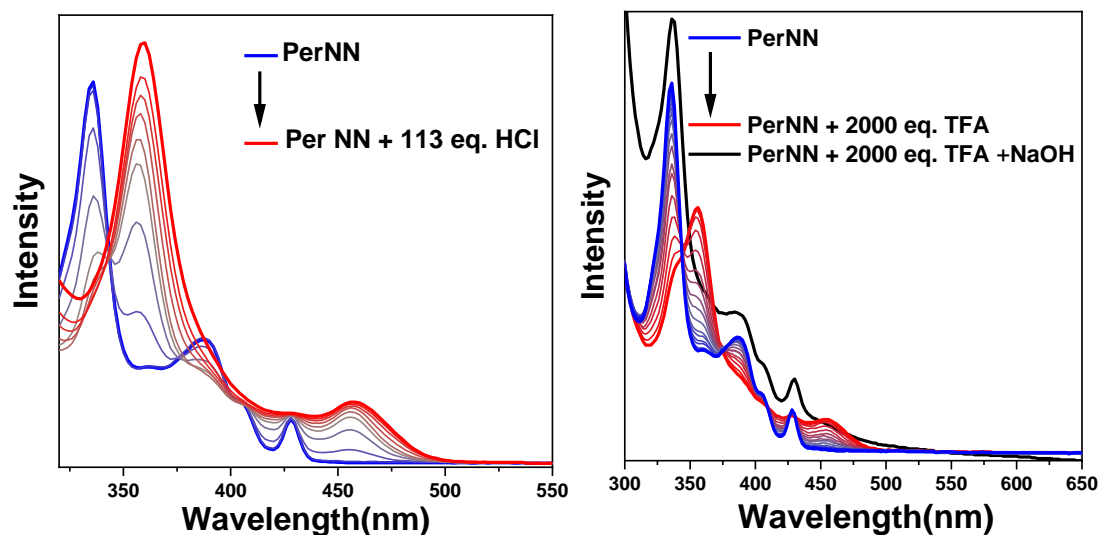

**Figure S17.** Acid (HCl, left; TFA, right)-induced UV-Vis absorption changes of compound **PerNN** in THF, and finally neutralized by NaOH (Concentration of **PerNN** is  $10^{-5}$  M).

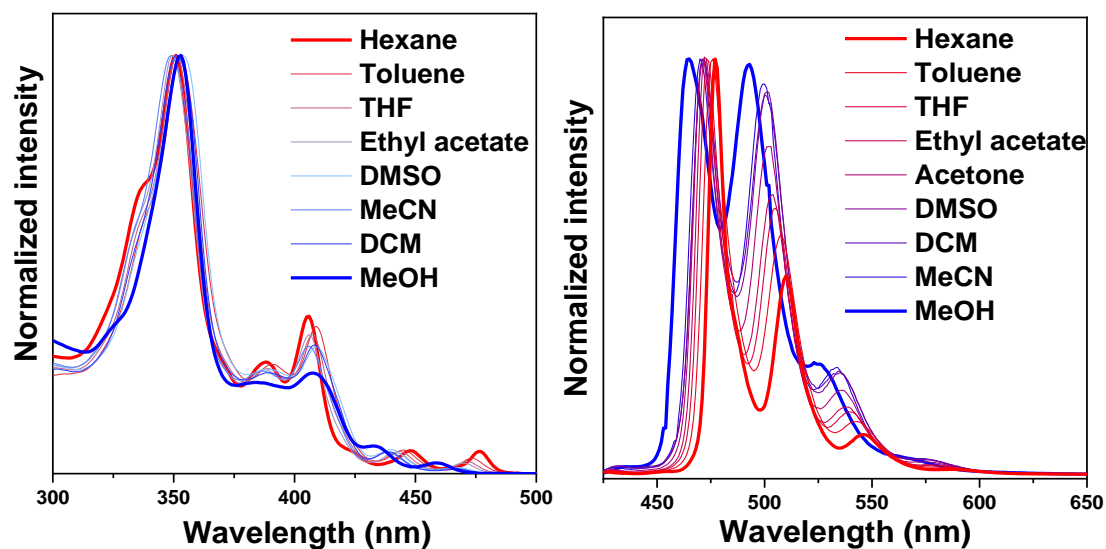

**Figure S18.** UV-vis absorption (left;  $10^{-5}$  M) and emission (right;  $10^{-5}$  M; excited with 370 nm) spectra of **PerNN-O** in different solvents.

**Table S7.** Summarize the photophysical properties of **PerNN-O** in different solvents.

| Solvent                          | Hexane | Toluene | THF  | Ethyl acetate | DCM | DMSO | MeCN | MeOH |
|----------------------------------|--------|---------|------|---------------|-----|------|------|------|
| $\lambda_{\text{abs}}/\text{nm}$ | 476    | 473     | 471  | 470           | 466 | 467  | 465  | 458  |
| $\lambda_{\text{em}}/\text{nm}$  | 476    | 476     | 473  | 472           | 471 | 471  | 471  | 464  |
| QY(%)                            |        |         | 8.00 |               |     |      |      |      |

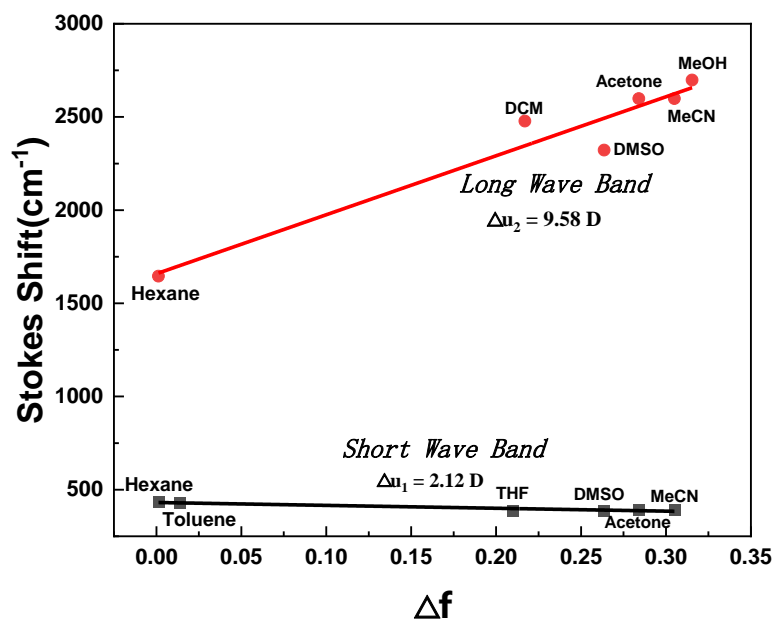

**Figure S19.** Lippert-Mataga solvatochromic model of **PerNN-MeI**.

#### 4. DFT calculations

Theoretical calculations were performed using the Gaussian 16 software package and Multiwfn programm.<sup>[2] [3] [4]</sup> Unless stated otherwise, geometry optimizations of all molecules in the ground state ( $S_0$ ) were performed using the B3LYP/6-31\*\*. The simulated electronic absorption spectra are on the basis of the optimized ground-state geometry and wavefunction by time-dependent density functional theory (TD-DFT) calculation at B3LYP/6-311\*\* level. The simulated electronic emission spectra are based on the optimized excited state geometries by TD-DFT calculation at B3LYP/6-311\*\* level. Nucleus independent chemical shifts (NICS)<sup>[6]</sup> values and anisotropy of the induced current density (ACID)<sup>[7]</sup> plot for the simulated aromatic properties of studied molecules have been computed at the B3LYP/6-311\*\* level based on the optimized ground-state geometries. Electrostatic potential (ESP) on the basis of the geometry and wavefunction at B3LYP/6-31\*\* level were performed with the Multiwfn 3.8 (dev) code. Isosurface maps of various real space functions were rendered by means of Visual Molecular Dynamics (VMD) software based on the files exported by Multiwfn.<sup>[4] [5]</sup>

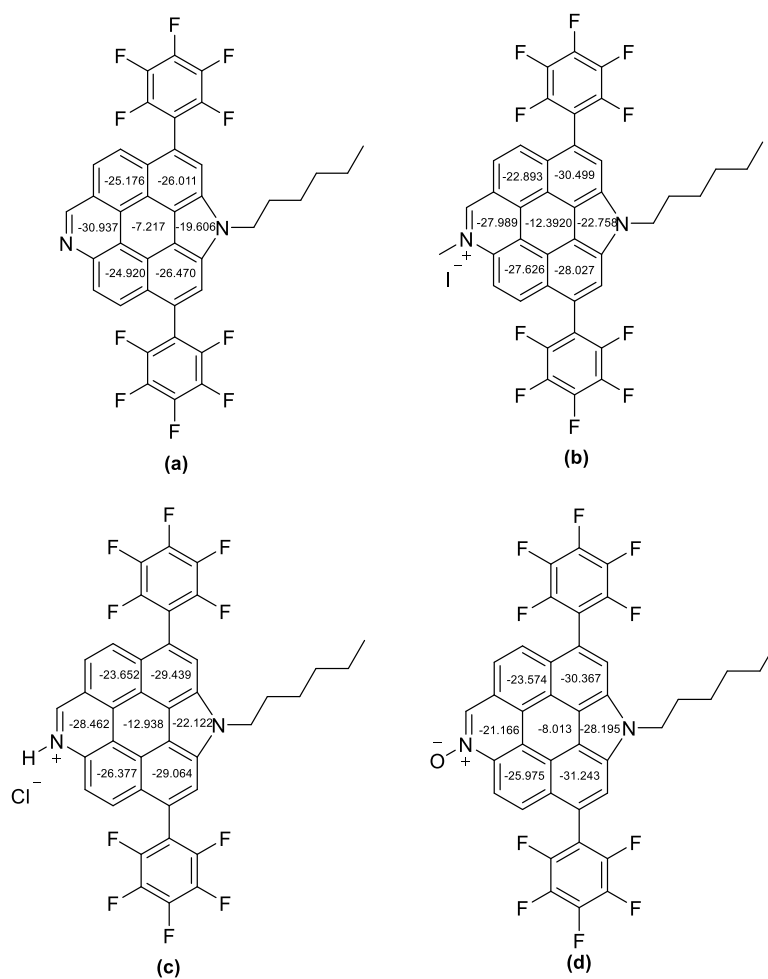

**Figure S20.** NICS(-1)<sub>zz</sub> plots of (a) **PerNN**, (b) **PerNN-Me<sup>+</sup>**, (c) **PerNN-H** and (d) **PerNN-O** calculated at B3LYP/6-311G\*\*.<sup>[6]</sup>



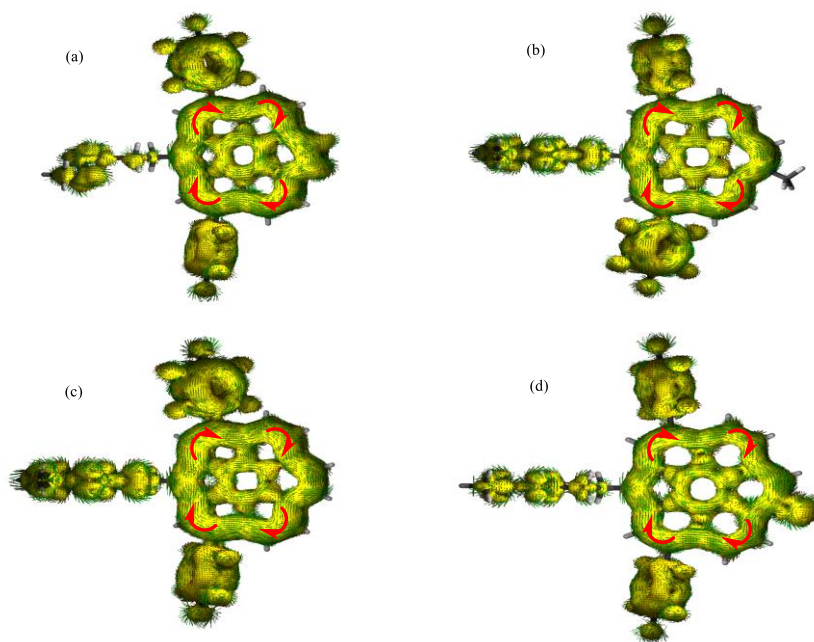

**Figure S21.** Calculated AICD plots (iso-value = 0.015- 0.03) of (a) **PerNN**, (b) **PerNN-Me<sup>+</sup>**, (c) **PerNN-H** and (d) **PerNN-O**.

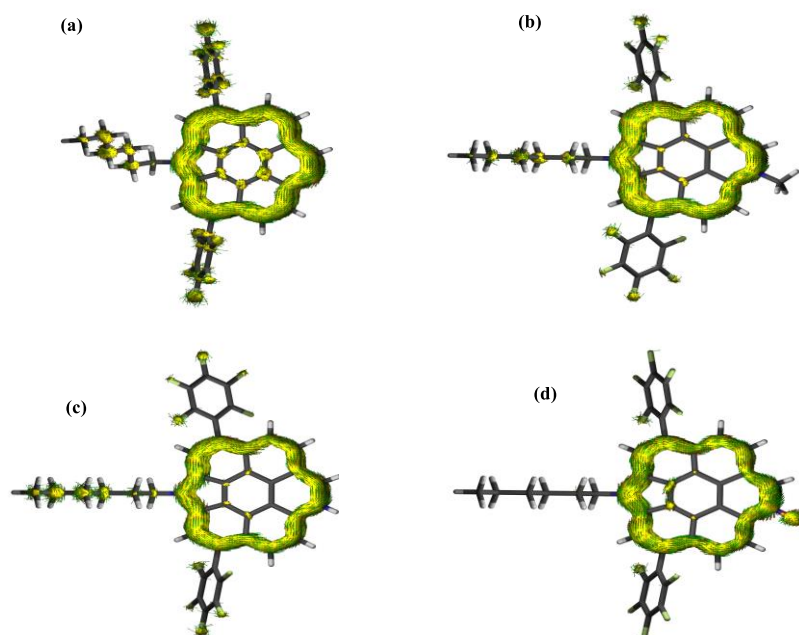

**Figure S22.** Calculated AICD plots (contribution from  $\pi$  electrons only, iso-value = 0.04 - 0.05) of (a) **PerNN**, (b) **PerNN-Me<sup>+</sup>**, (c) **PerNN-H** and (d) **PerNN-O**.<sup>[7]</sup>

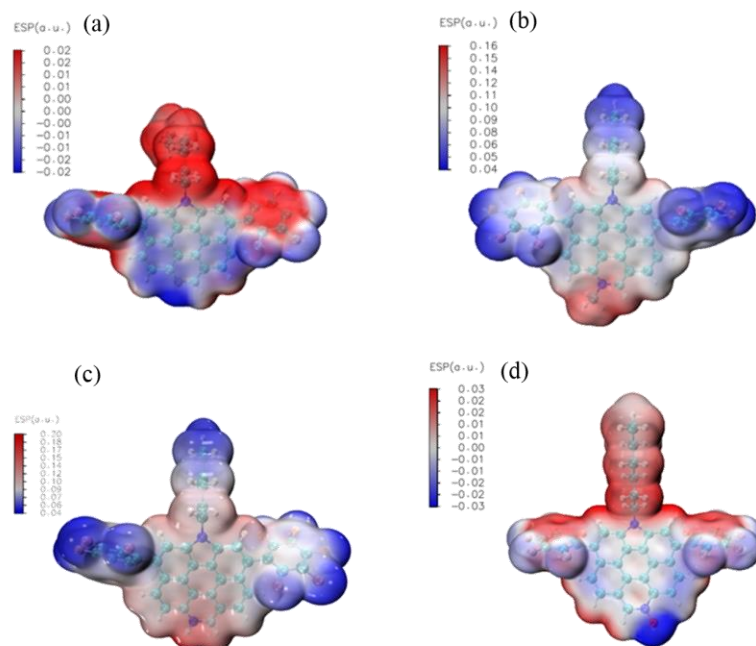

**Figure S23.** ESP plots of (a) PerNN, (b) PerNN-Me<sup>+</sup>, (c) PerNN-H and (d) PerNN-O calculated at B3LYP/6-31G\*\*.<sup>[4][5]</sup>

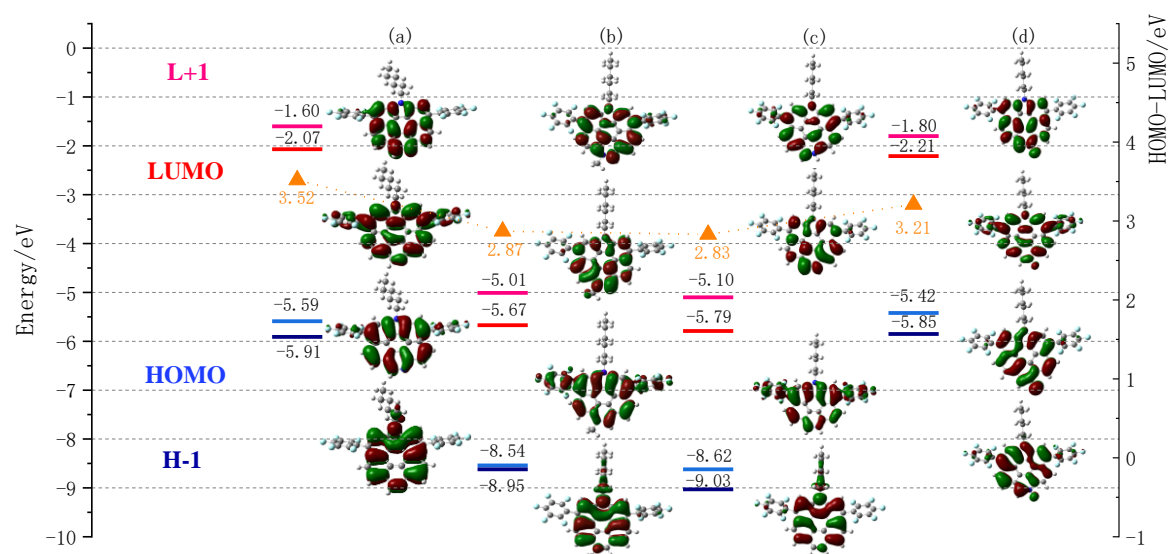

**Figure S24.** HOMO-1, HOMO, LUMO and LUMO+1 orbitals and their energy levels of (a) PerNN, (b) PerNN-Me<sup>+</sup>, (c) PerNN-H and (d) PerNN-O calculated at B3LYP/6-31G\*\*.

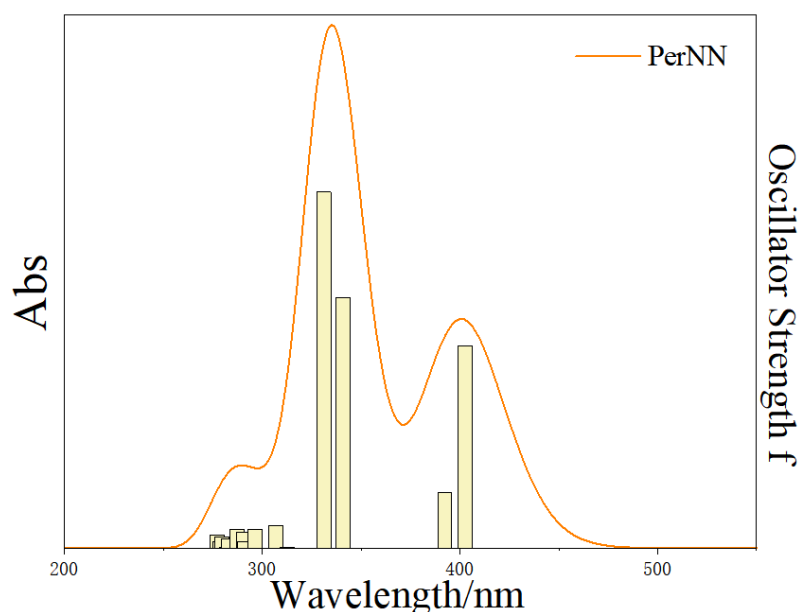

**Figure S25.** TD-DFT (B3LYP/6-311G\*\*) simulated UV-Vis-NIR absorption spectra with oscillator strength of compound **PerNN**.

**Table S8.** Selected TD-DFT (B3LYP/6-311G\*\*) calculated absorption wavelength, oscillator strength and compositions of major electronic transitions of **PerNN**.

| State           | Energy [eV] | $\lambda$ [nm] | $f$    | Orbitals(coefficient)                                          |
|-----------------|-------------|----------------|--------|----------------------------------------------------------------|
| S1              | 3.08        | 403            | 0.3792 | HOMO→LUMO (78%)                                                |
| S2              | 3.17        | 392            | 0.1044 | H-1→LUMO (55%), HOMO→LUMO (12%), HOMO→L+1 (31%)                |
| S3              | 3.64        | 341            | 0.4694 | H-1→LUMO (32%), HOMO→L+1 (54%)                                 |
| S4              | 3.75        | 331            | 0.6672 | H-1→L+1 (80%)                                                  |
| S5              | 3.97        | 312            | 0.0021 | HOMO→L+3 (85%)                                                 |
| S6              | 4.05        | 307            | 0.0424 | HOMO→L+2 (95%)                                                 |
| <b>PerNN</b> S7 | 4.19        | 296            | 0.0359 | H-2→LUMO (79%)                                                 |
| S8              | 4.26        | 291            | 0.013  | H-6→LUMO (48%), H-1→L+3 (25%)                                  |
| S9              | 4.27        | 291            | 0.03   | H-6→LUMO (30%), H-1→L+3 (50%)                                  |
| S10             | 4.33        | 287            | 0.0359 | H-2→LUMO (11%), H-1→L+2 (60%)                                  |
| S11             | 4.39        | 283            | 0.0178 | H-3→LUMO (27%), H-1→L+2 (24%), HOMO→L+4 (15%), HOMO→L+6 (11%)  |
| S12             | 4.40        | 282            | 0.0016 | H-6→LUMO (14%), H-6→L+1 (75%)                                  |
| S13             | 4.44        | 280            | 0.0215 | H-4→LUMO (34%), H-3→LUMO (22%), HOMO→L+4 (21%), HOMO→L+5 (10%) |

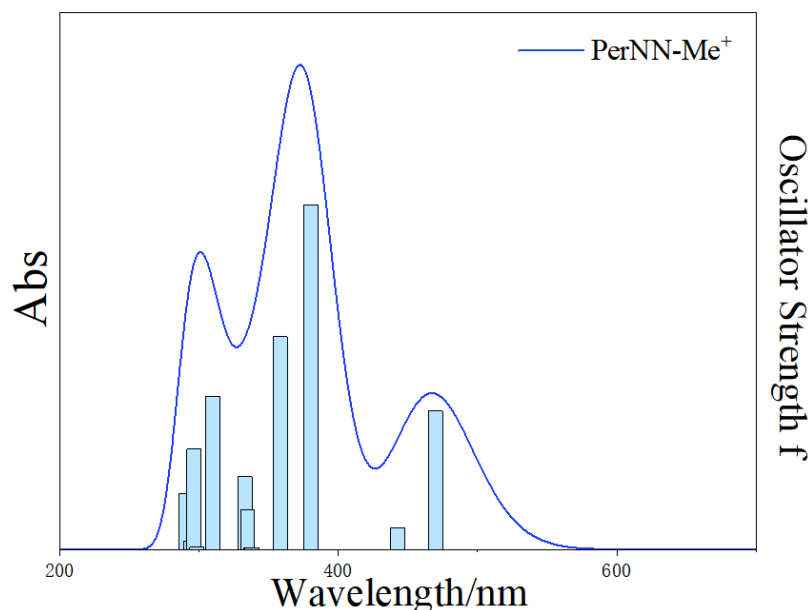

**Figure S26.** TD-DFT (B3LYP/6-311G\*\*) simulated UV-Vis-NIR absorption spectra with oscillator strength of compound **PerNN-Me<sup>+</sup>**.

**Table S9.** Selected TD-DFT (B3LYP/6-311G\*\*) calculated absorption wavelength, oscillator strength and compositions of major electronic transitions of **PerNN-Me<sup>+</sup>**.

|                             | State | Energy [eV] | $\lambda$ [nm] | $f$    | Orbitals(coefficient)                                        |
|-----------------------------|-------|-------------|----------------|--------|--------------------------------------------------------------|
|                             | S1    | 2.64        | 470            | 0.2195 | HOMO→LUMO (93%)                                              |
|                             | S2    | 2.81        | 443            | 0.0346 | H-1→LUMO (80%), HOMO→L+1 (17%)                               |
|                             | S3    | 3.27        | 380            | 0.5457 | H-1→LUMO (12%), HOMO→L+1 (73%)                               |
|                             | S4    | 3.47        | 358            | 0.3369 | H-1→L+1 (85%)                                                |
|                             | S5    | 3.68        | 338            | 0.0032 | H-3→LUMO (64%), H-2→LUMO (29%)                               |
|                             | S6    | 3.68        | 338            | 0.0034 | H-3→LUMO (31%), H-2→LUMO (67%)                               |
|                             | S7    | 3.71        | 335            | 0.0623 | H-5→LUMO (19%), H-4→LUMO (72%)                               |
| <b>PerNN-Me<sup>+</sup></b> | S8    | 3.73        | 333            | 0.1157 | H-5→LUMO (67%), H-4→LUMO (20%)                               |
|                             | S9    | 4.01        | 310            | 0.2427 | HOMO→L+2 (90%)                                               |
|                             | S10   | 4.16        | 299            | 0.0041 | H-2→L+1 (96%)                                                |
|                             | S11   | 4.19        | 297            | 0.1595 | H-7→LUMO (14%), H-5→L+1 (26%), H-4→L+1 (33%)                 |
|                             | S13   | 4.22        | 294            | 0.0126 | H-3→L+1 (88%)                                                |
|                             | S14   | 4.27        | 291            | 0.0892 | H-6→LUMO (12%), H-5→L+1 (39%), H-4→L+1 (22%), HOMO→L+3 (12%) |
|                             | S15   | 4.27        | 291            | 0.0701 | H-7→LUMO (40%), H-4→L+1 (25%), HOMO→L+3 (18%)                |

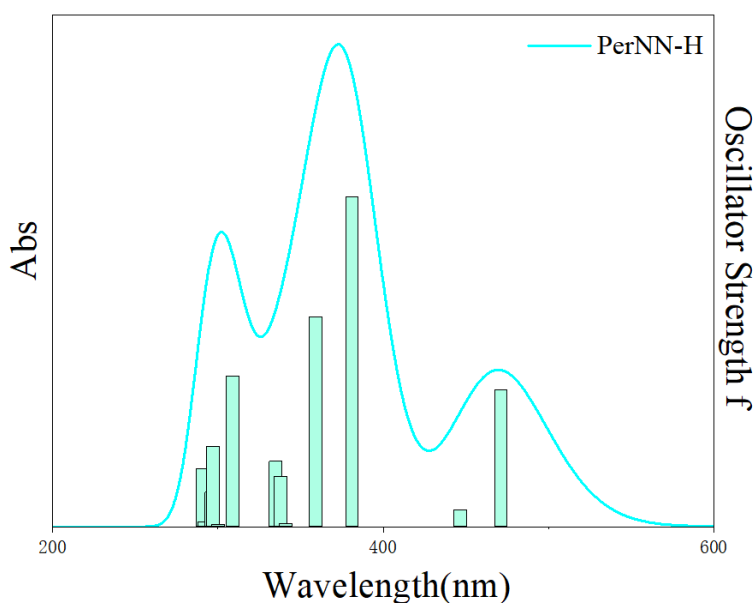

**Figure S27.** TD-DFT (B3LYP/6-311G\*\*) simulated UV-Vis-NIR absorption spectra with oscillator strength of compound **PerNN-H**.

**Table S10.** Selected TD-DFT (B3LYP/6-311G\*\*) calculated absorption wavelength, oscillator strength and compositions of major electronic transitions of **PerNN-H**.

| State             | Energy [eV] | $\lambda$ [nm] | $f$    | Orbitals(coefficient)                                       |
|-------------------|-------------|----------------|--------|-------------------------------------------------------------|
| S1                | 2.64        | 471            | 0.2143 | HOMO→LUMO (93%)                                             |
| S2                | 2.78        | 447            | 0.0266 | H-1→LUMO (82%), HOMO→L+1 (15%)                              |
| S3                | 3.26        | 381            | 0.5153 | H-1→LUMO (11%), HOMO→L+1 (75%)                              |
| S4                | 3.46        | 359            | 0.3287 | H-1→L+1 (85%)                                               |
| S6                | 3.64        | 341            | 0.0050 | H-3→LUMO (80%), H-2→LUMO (18%)                              |
| <b>PerNN-H</b> S7 | 3.67        | 338            | 0.0792 | H-5→LUMO (13%), H-4→LUMO (80%)                              |
| S8                | 3.71        | 335            | 0.1025 | H-5→LUMO (76%), H-4→LUMO (12%)                              |
| S9                | 4.02        | 309            | 0.2355 | HOMO→L+2 (89%)                                              |
| S10               | 4.14        | 300            | 0.0035 | H-2→L+1 (97%)                                               |
| S11               | 4.18        | 297            | 0.1258 | H-7→LUMO (10%), H-5→L+1 (18%), H-4→L+1 (23%), H-3→L+1 (34%) |
| S12               | 4.19        | 296            | 0.0541 | H-6→LUMO (10%), H-4→L+1 (10%), H-3→L+1 (60%)                |
| S13               | 4.20        | 296            | 0.0079 | H-6→LUMO (61%), H-4→L+1 (15%)                               |
| S14               | 4.25        | 292            | 0.0076 | H-5→L+1 (39%), H-4→L+1 (41%)                                |

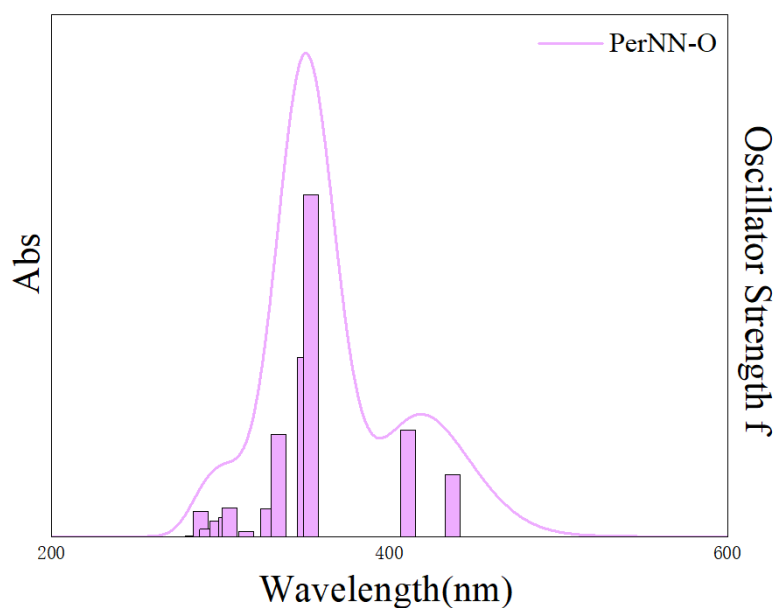

**Figure S28.** TD-DFT (B3LYP/6-311G\*\*) simulated UV-Vis-NIR absorption spectra with oscillator strength of compound **PerNN-O**.

**Table S11.** Selected TD-DFT (B3LYP/6-311G\*\*) calculated absorption wavelength, oscillator strength and compositions of major electronic transitions of **PerNN-O**.

| State          | Energy [eV] | $\lambda$ [nm] | $f$ | Orbitals(coefficient) |                                                 |
|----------------|-------------|----------------|-----|-----------------------|-------------------------------------------------|
| <b>PerNN-O</b> | S1          | 2.84           | 437 | 0.1367                | H-1→LUMO (14%), HOMO→LUMO (58%), HOMO→L+1 (20%) |
|                | S2          | 3.02           | 411 | 0.2345                | H-1→LUMO (44%), HOMO→LUMO (31%), HOMO→L+1 (21%) |
|                | S3          | 3.51           | 354 | 0.7529                | H-2→LUMO (14%), H-1→LUMO (30%), HOMO→L+1 (41%)  |
|                | S4          | 3.55           | 350 | 0.3948                | H-1→L+1 (70%)                                   |
|                | S5          | 3.71           | 334 | 0.2258                | H-2→LUMO (53%), HOMO→L+2 (25%)                  |
|                | S6          | 3.79           | 328 | 0.0609                | H-2→LUMO (19%), HOMO→L+2 (66%)                  |
|                | S8          | 3.94           | 315 | 0.0100                | HOMO→L+3 (86%)                                  |
|                | S9          | 4.07           | 305 | 0.0616                | H-2→L+1 (39%), H-1→L+2 (45%)                    |
|                | S10         | 4.10           | 303 | 0.0409                | H-2→L+1 (38%), H-1→L+2 (44%)                    |
|                | S11         | 4.17           | 298 | 0.0349                | H-4→LUMO (42%), H-3→LUMO (12%), H-1→L+3 (29%)   |
|                | S12         | 4.25           | 292 | 0.0157                | H-4→LUMO (26%), H-1→L+3 (54%)                   |
|                | S14         | 4.31           | 288 | 0.0550                | H-1→L+3 (11%), HOMO→L+4 (45%), HOMO→L+6 (22%)   |
|                | S15         | 4.38           | 284 | 0.0020                | H-6→LUMO (60%), H-5→LUMO (11%), HOMO→L+5 (14%)  |

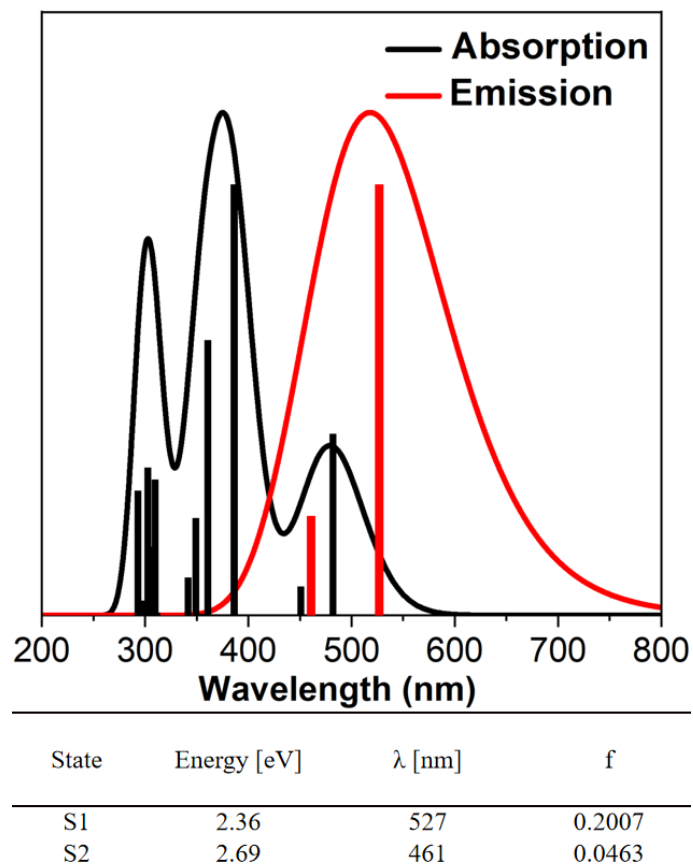

**Figure S29.** Simulated absorption and emission spectra, and vertical  $S_n \rightarrow S_0$  deexcitation, oscillation strengths (f) of **PerNN-Me<sup>+</sup>** based on the optimized ground state (absorption) and optimized excited state (emission) geometry calculated at the B3LYP/6-311\*\* level.

### Crystal information

Single crystal **PerNN** is obtained by slow diffusion of hexane to a solution of **PerNN** in chloroform at room temperature over five days.

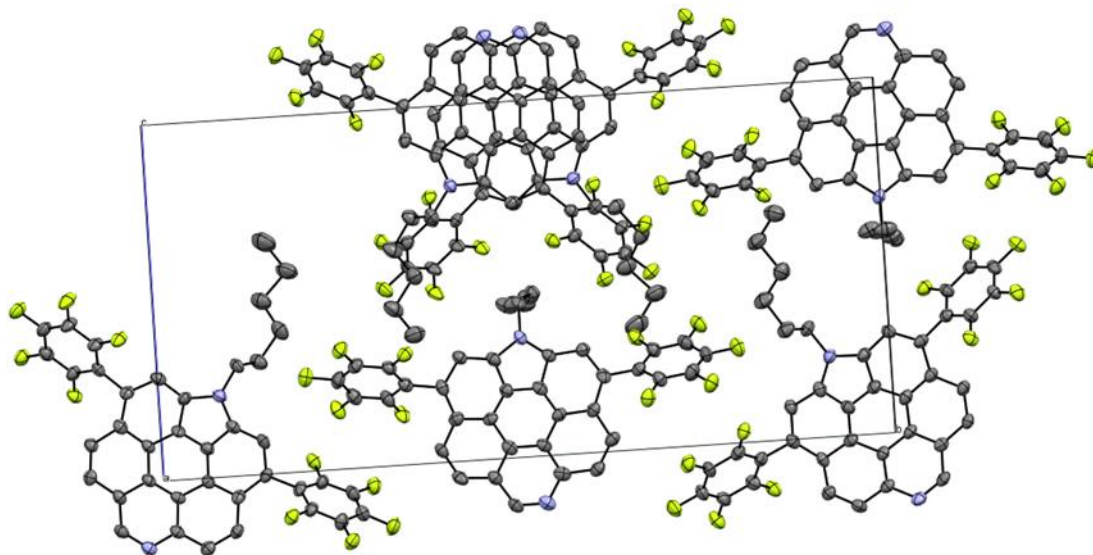

**Figure S30.** Packing mode of single crystal **PerNN** in a unit cell viewed along a axis.

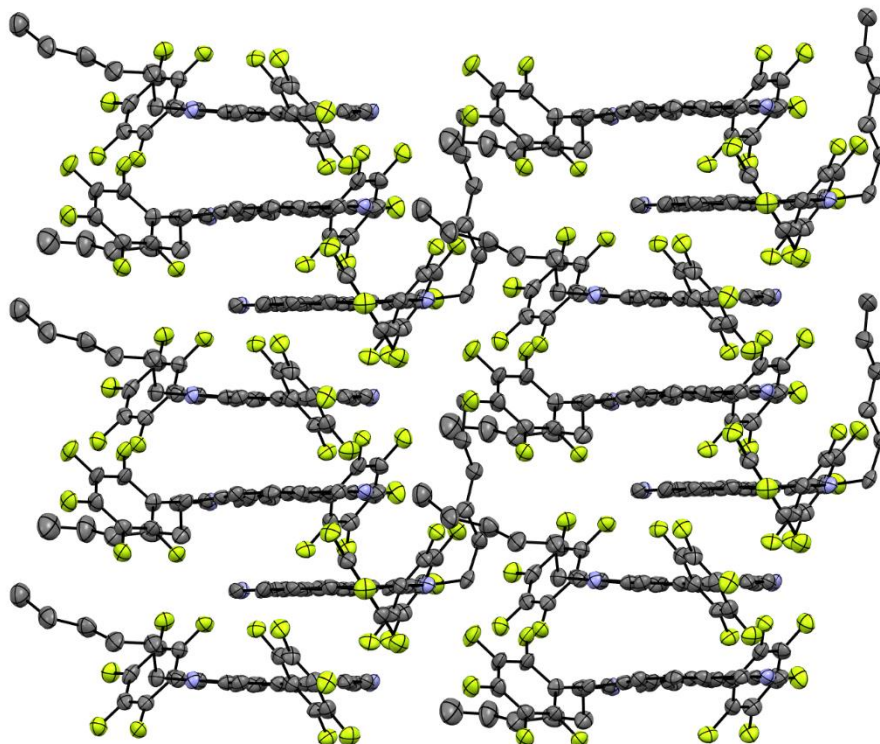

**Figure S31.** Packing mode of single crystal **PerNN**.



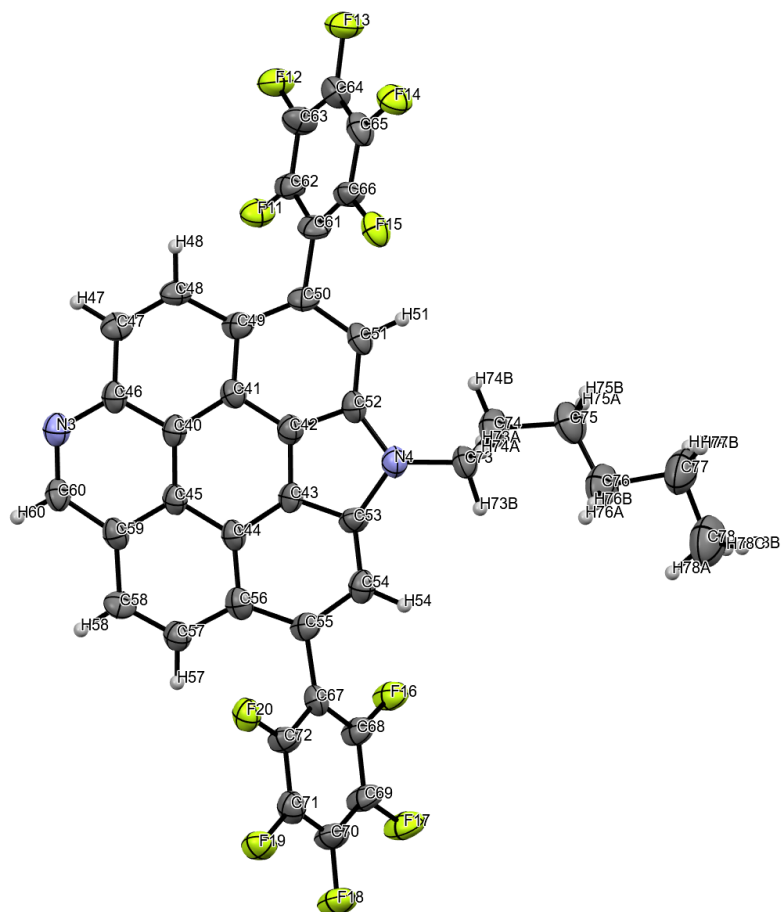

**Figure S32.** Thermal ellipsoid plot of **PerNN**.

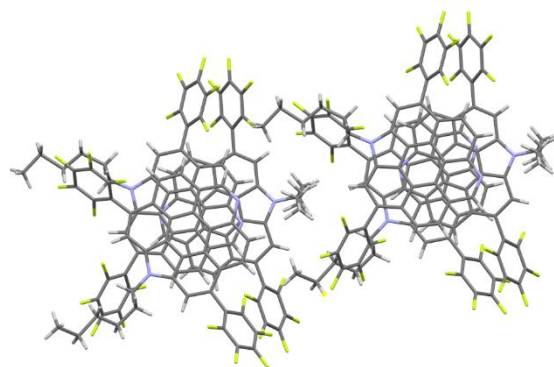

**Figure S33.** Top view of **PerNN** along a axis.

**Table S12.** Crystallographic data for **PerNN**.

|                     |                         |
|---------------------|-------------------------|
| Identification code | 230425                  |
| Empirical formula   | $C_{39}H_{20}N_2F_{10}$ |
| Formula weight      | 706.57                  |
| Temperature/K       | 193.0                   |

|                                             |                                                                |
|---------------------------------------------|----------------------------------------------------------------|
| Crystal system                              | monoclinic                                                     |
| Space group                                 | P2 <sub>1</sub>                                                |
| a/Å                                         | 10.3159(5)                                                     |
| b/Å                                         | 30.2698(11)                                                    |
| c/Å                                         | 15.1352(6)                                                     |
| α/°                                         | 90                                                             |
| β/°                                         | 103.948(3)                                                     |
| γ/°                                         | 90                                                             |
| Volume/Å <sup>3</sup>                       | 4586.8(3)                                                      |
| Z                                           | 6                                                              |
| ρ <sub>calc</sub> /g/cm <sup>3</sup>        | 1.535                                                          |
| μ/mm <sup>-1</sup>                          | 0.737                                                          |
| F(000)                                      | 2148.0                                                         |
| Crystal size/mm <sup>3</sup>                | 0.18 × 0.18 × 0.02                                             |
| Radiation                                   | GaKα (λ = 1.34139)                                             |
| 2θ range for data collection/°              | 5.08 to 111.996                                                |
| Index ranges                                | -12 ≤ h ≤ 12, -37 ≤ k ≤ 21, -18 ≤ l ≤ 17                       |
| Reflections collected                       | 28223                                                          |
| Independent reflections                     | 13636 [R <sub>int</sub> = 0.0517, R <sub>sigma</sub> = 0.0519] |
| Data/restraints/parameters                  | 13636/1/1381                                                   |
| Goodness-of-fit on F <sup>2</sup>           | 1.054                                                          |
| Final R indexes [I ≥ 2σ (I)]                | R <sub>1</sub> = 0.0486, wR <sub>2</sub> = 0.1133              |
| Final R indexes [all data]                  | R <sub>1</sub> = 0.0699, wR <sub>2</sub> = 0.1224              |
| Largest diff. peak/hole / e Å <sup>-3</sup> | 0.49/-0.27                                                     |
| Flack parameter                             | 0.09(10)                                                       |

## 6. Appendix: $^1\text{H}/^{13}\text{C}$ NMR, HRMS spectra and IR spectra

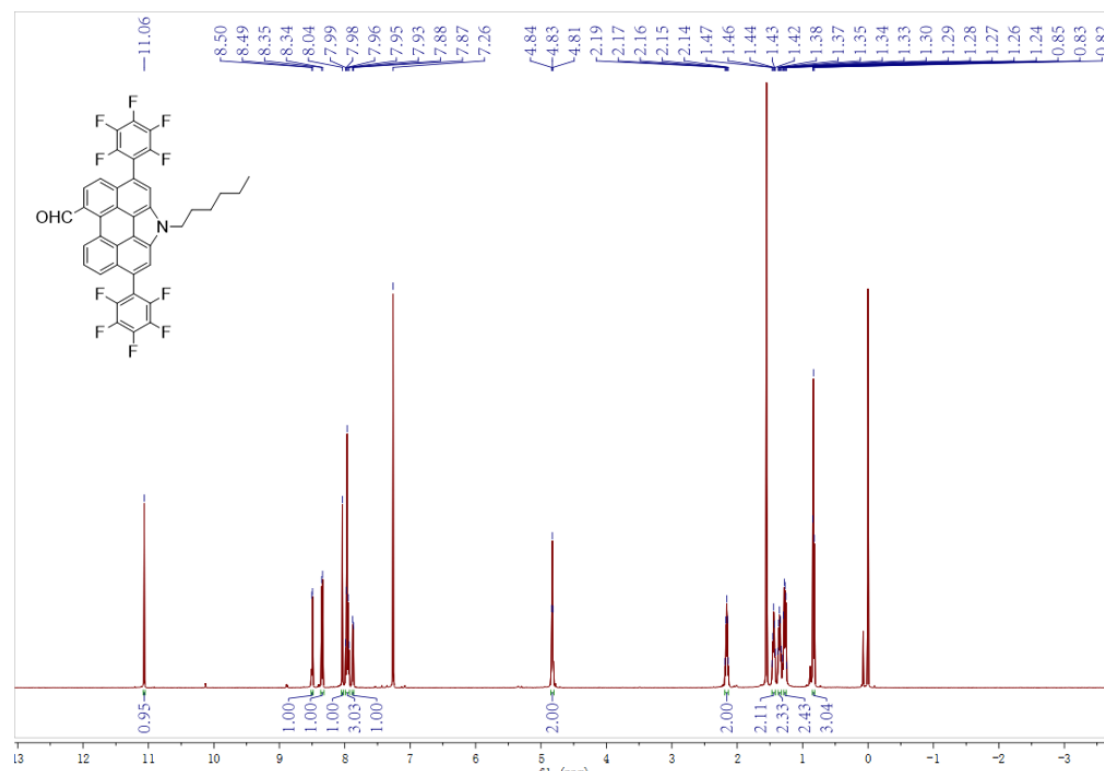

Figure S34.  $^1\text{H}$  NMR (600 MHz) spectrum of compound NP-CHO in  $\text{CDCl}_3$ .

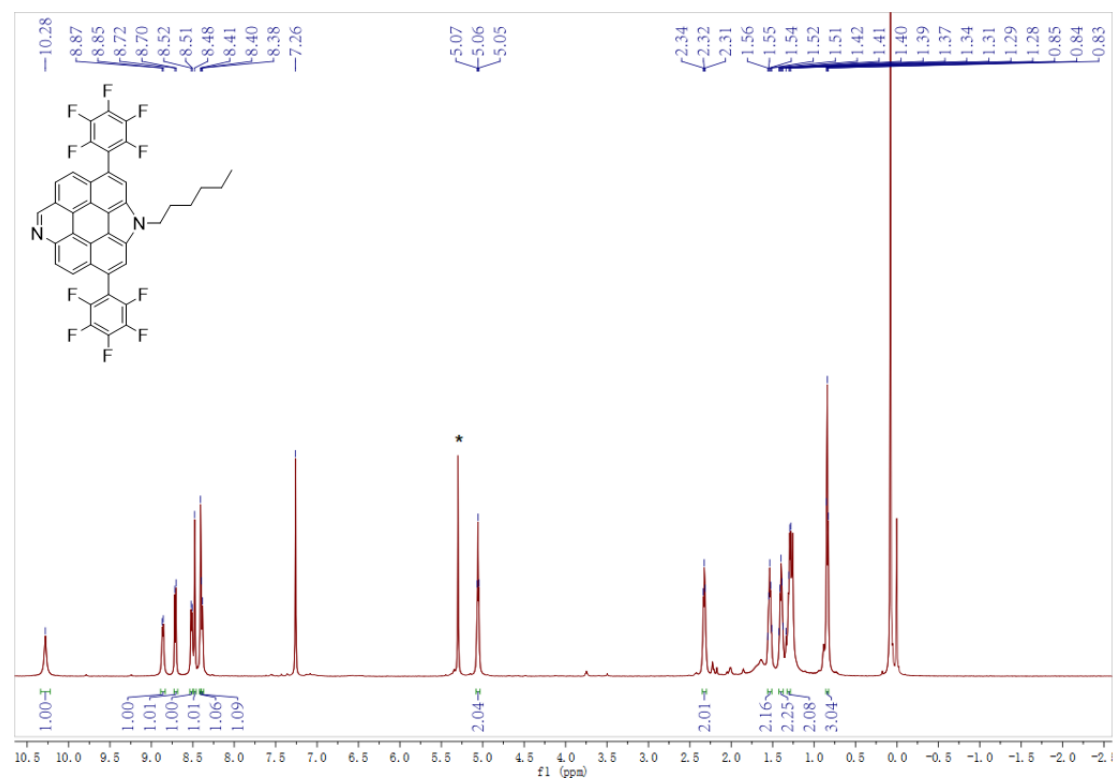

Figure S35.  $^1\text{H}$  NMR (600 MHz) spectrum of compound PerNN in  $\text{CDCl}_3$  (\* denotes the impurity from solvent).

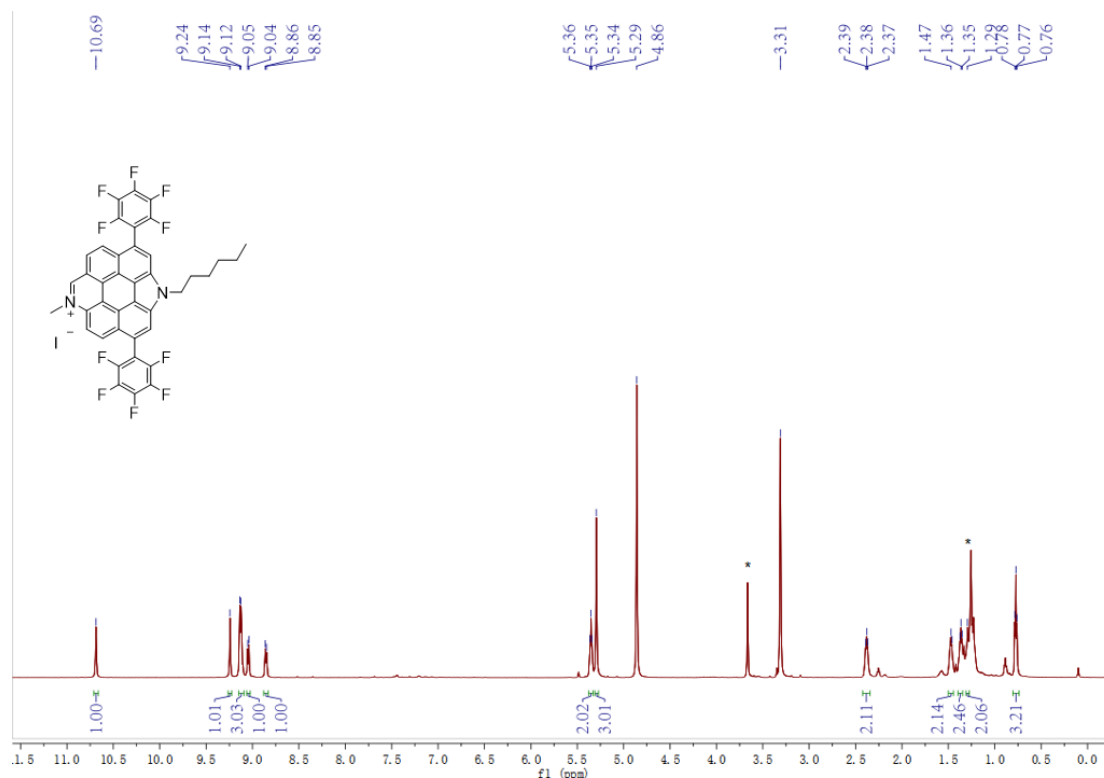

**Figure S36.**  $^1\text{H}$  NMR (600 MHz) spectrum of compound **PerNN-MeI** in MeOD (\* denotes the impurity from solvent).

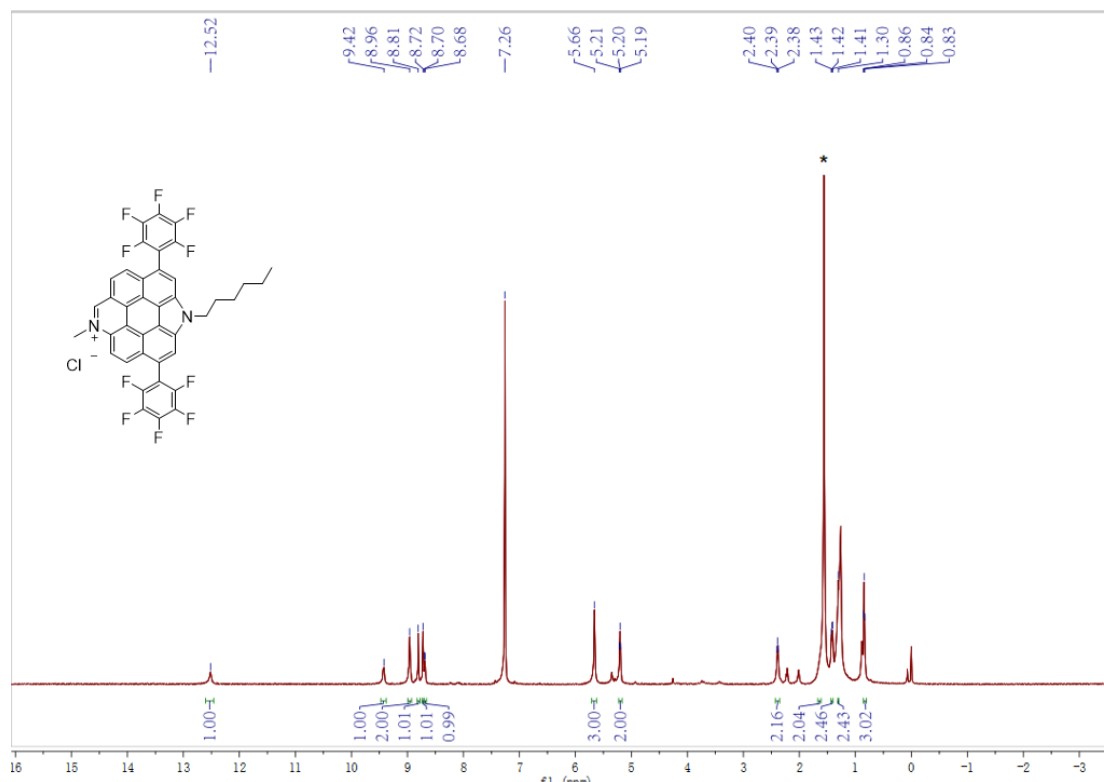

**Figure S37.**  $^1\text{H}$  NMR (600 MHz) spectrum of compound **PerNN-MeCl** in  $\text{CDCl}_3$  (\* denotes the impurity from solvent).

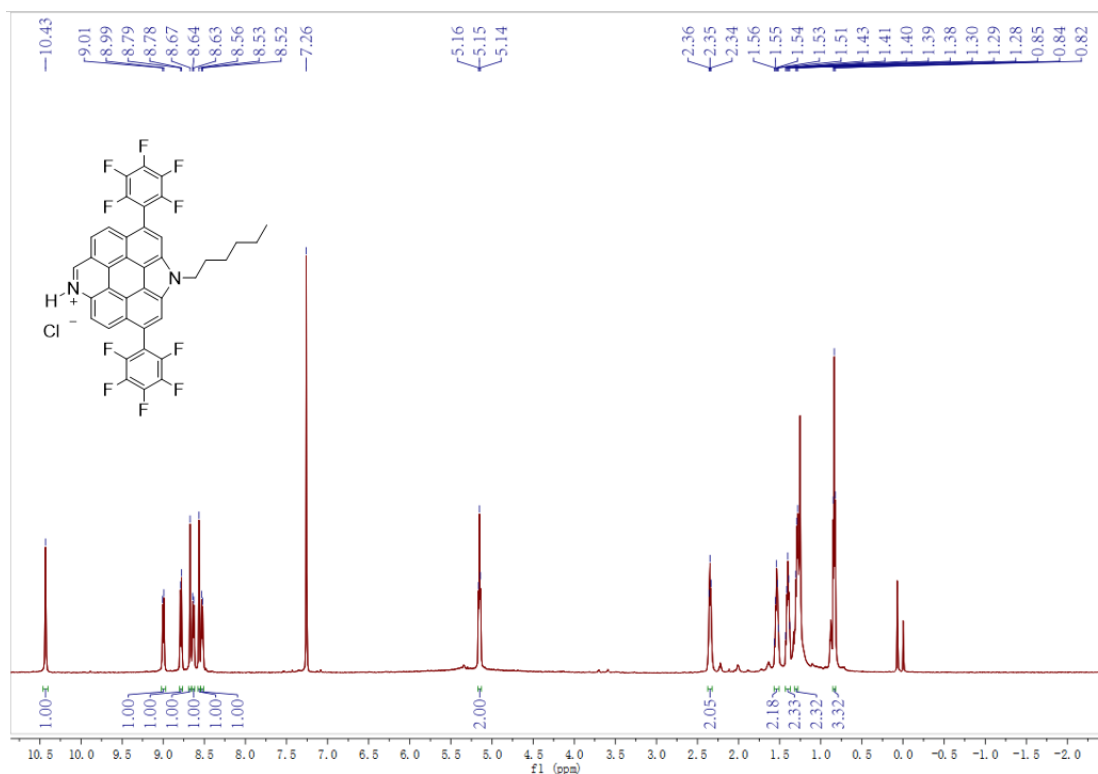

**Figure S38.** <sup>1</sup>H NMR (600 MHz) spectrum of compound PerNN-H in CDCl<sub>3</sub>.

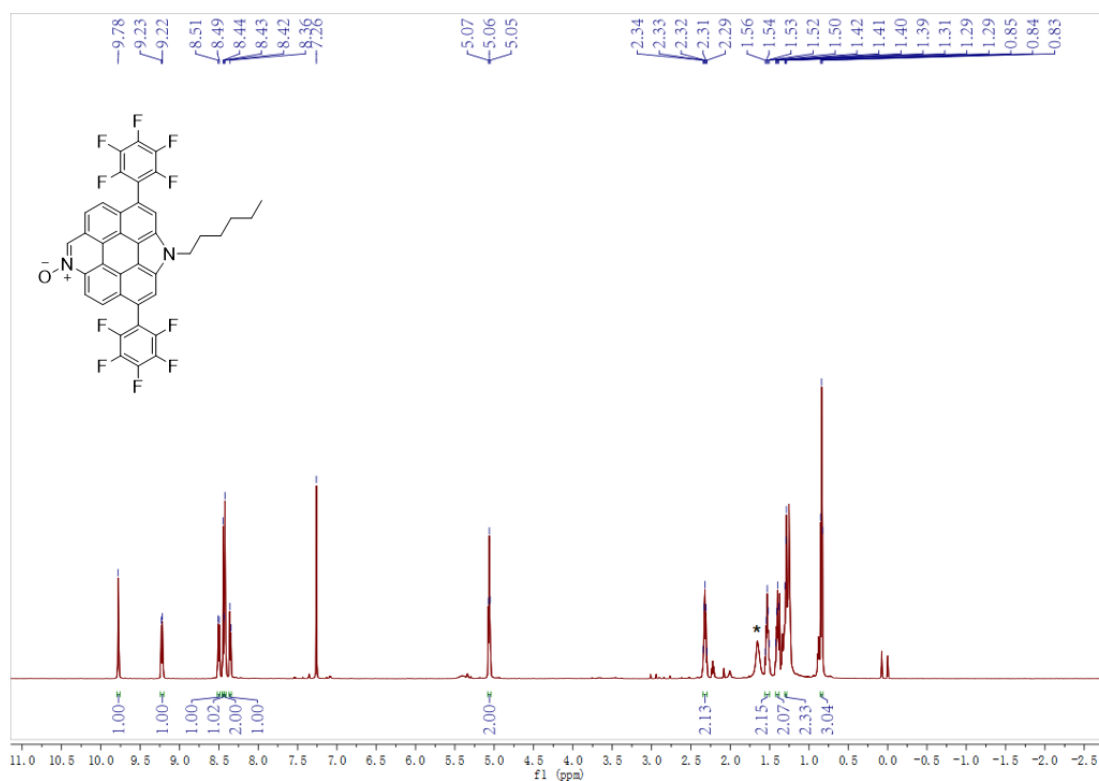

**Figure S39.** <sup>1</sup>H NMR (600 MHz) spectrum of compound PerNN-O in CDCl<sub>3</sub> (\* denotes the impurity from solvent).

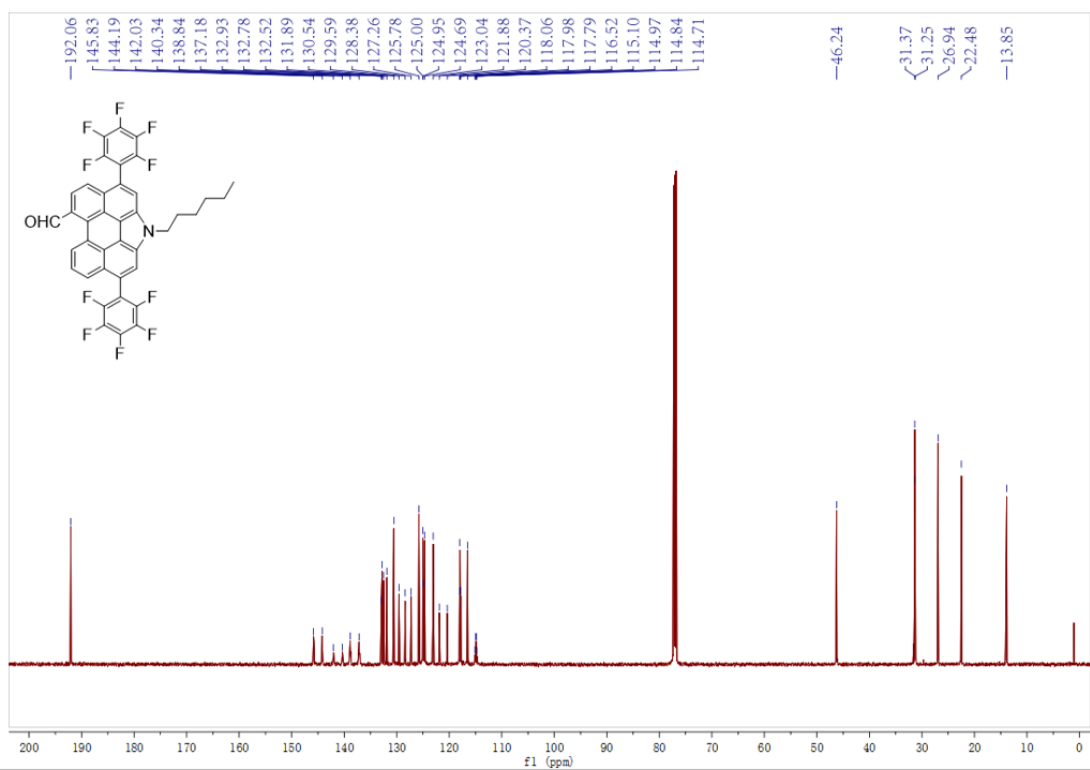

**Figure S40.**  $^{13}\text{C}$  NMR (151 MHz) spectrum of compound NP-CHO in  $\text{CDCl}_3$ .

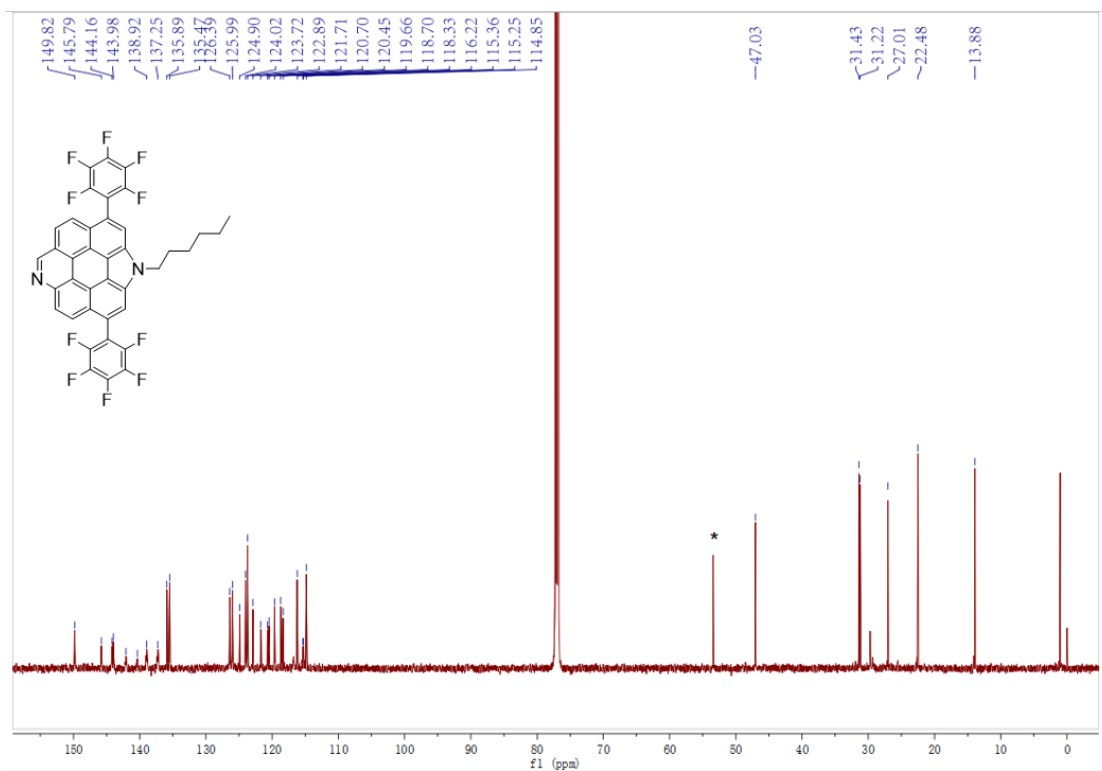

**Figure S41.**  $^{13}\text{C}$  NMR (151 MHz) spectrum of compound PerNN in  $\text{CDCl}_3$  (\* denotes the impurity from solvent).

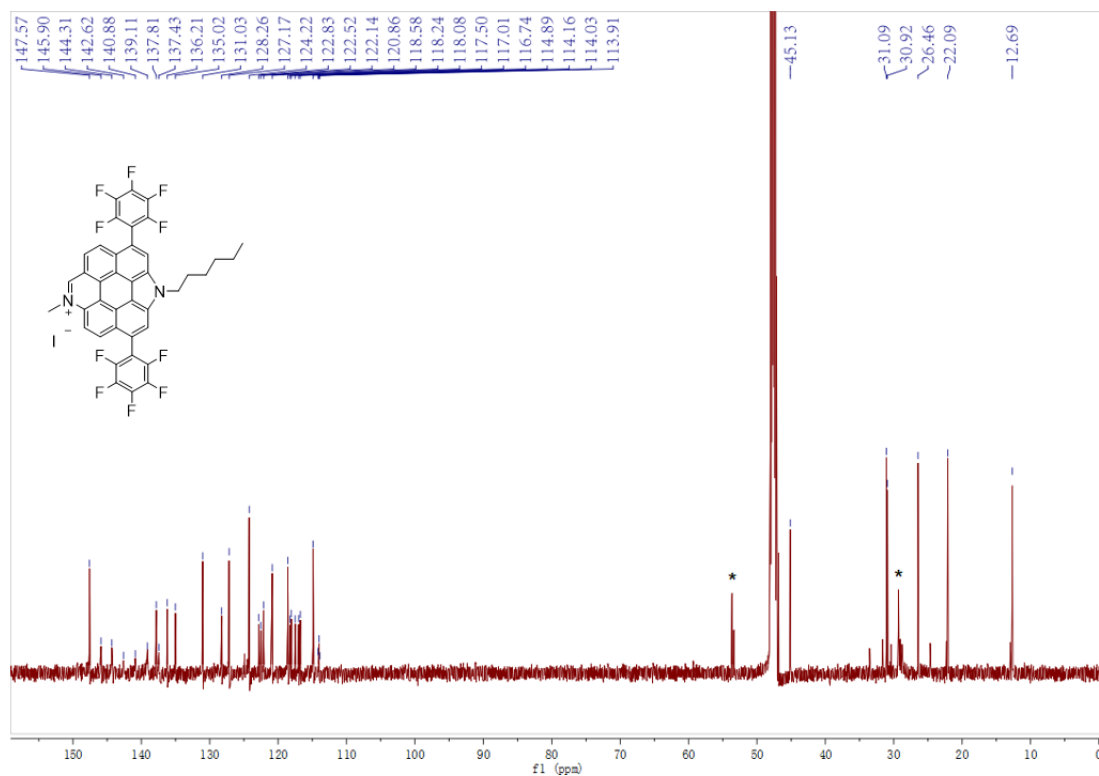

**Figure S42.**  $^{13}\text{C}$  NMR (151 MHz) spectrum of compound PerNN-MeI in MeOD (\* denotes the impurity from solvent).

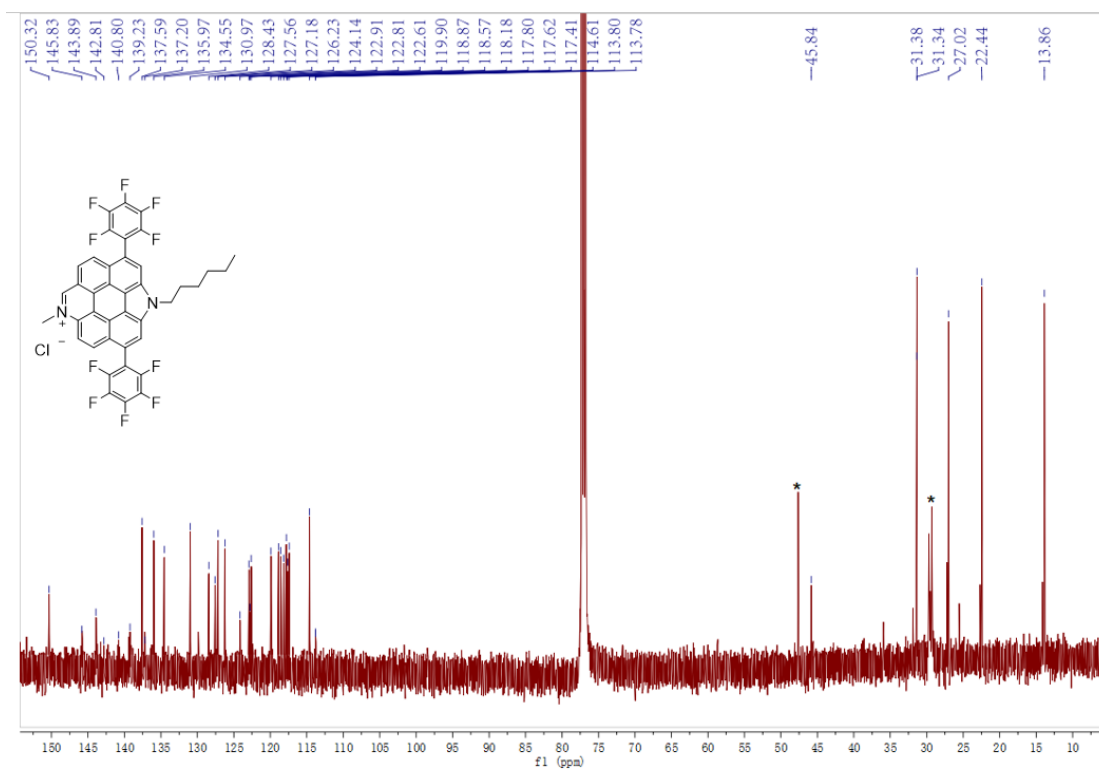

**Figure S43.**  $^{13}\text{C}$  NMR (151 MHz) spectrum of compound PerNN-MeCl in  $\text{CDCl}_3$  (\* denotes the impurity from solvent).

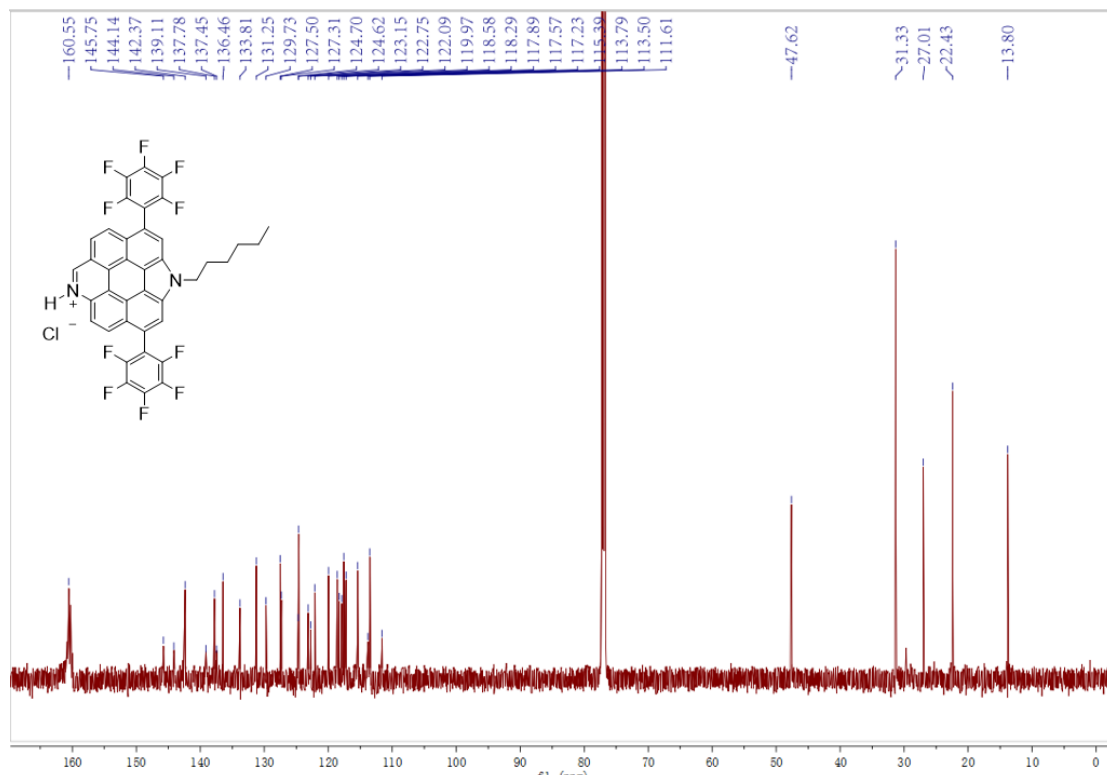

**Figure S44.**  $^{13}\text{C}$  NMR (151 MHz) spectrum of compound PerNN-H in  $\text{CDCl}_3$ .

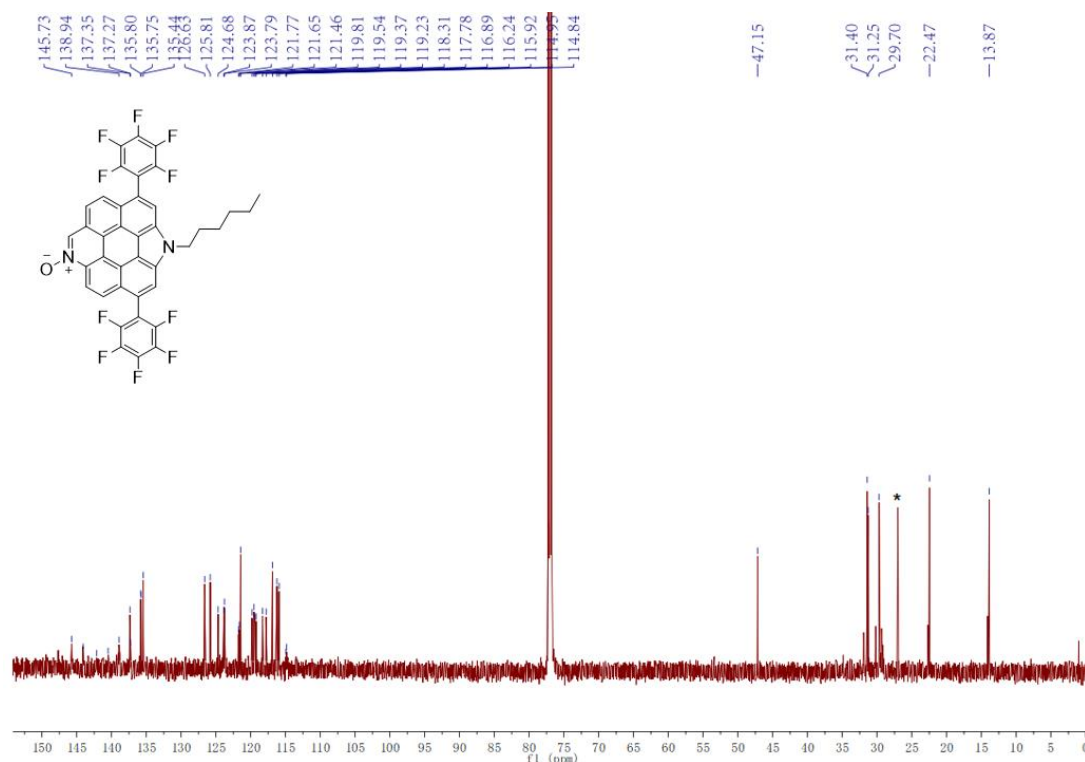

**Figure S45.**  $^{13}\text{C}$  NMR (151 MHz) spectrum of compound PerNN-O in  $\text{CDCl}_3$  (\* denotes the impurity from solvent).



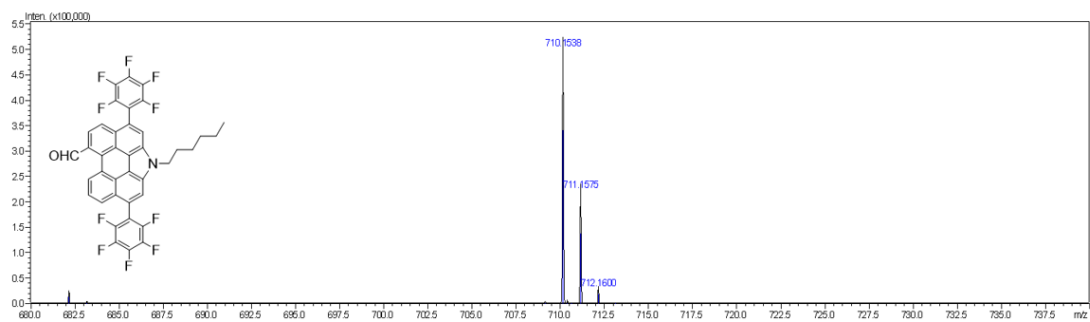

**Figure S46.** HRMS of compound NP-CHO.

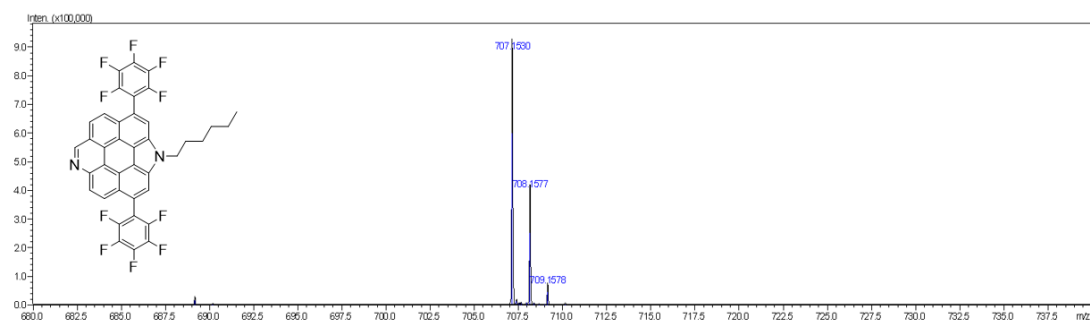

**Figure S47.** HRMS of compound PerNN.

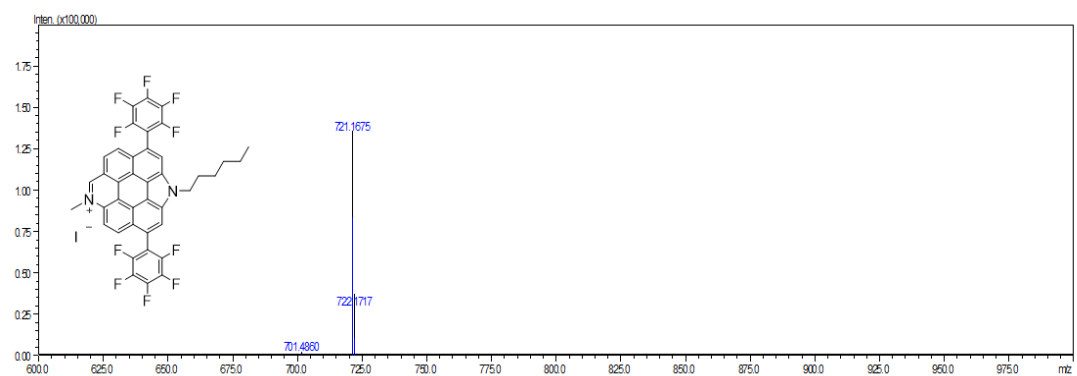

**Figure S48.** HRMS of compound PerNN-MeI.

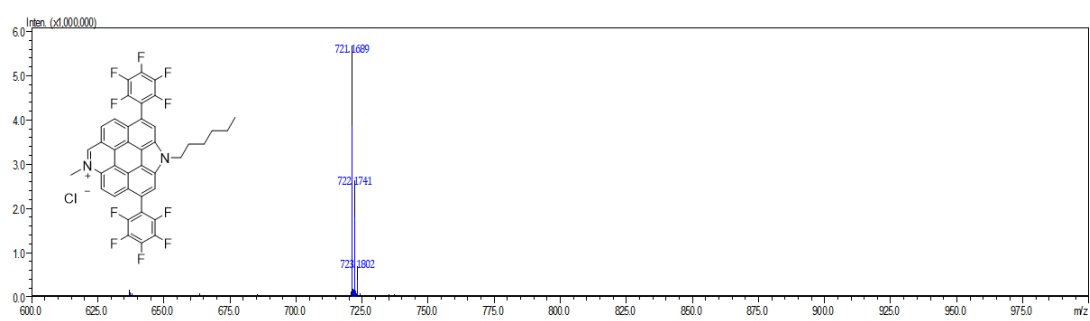

**Figure S49.** HRMS of compound PerNN-MeCl.

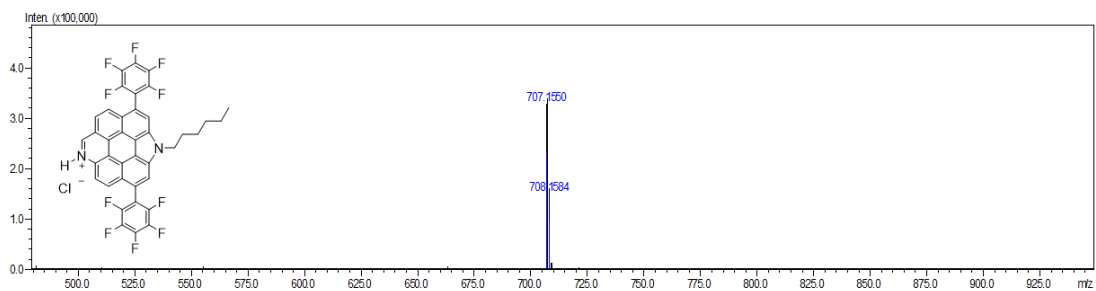

Figure S50. HRMS of compound PerNN-H.

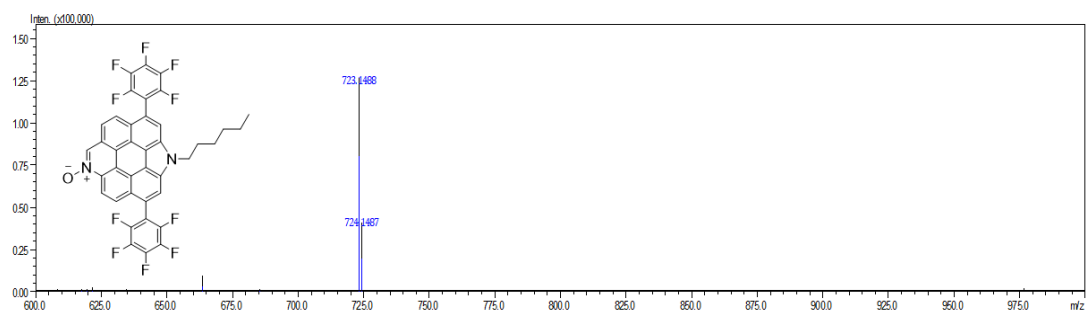

Figure S51. HRMS of compound PerNN-O.

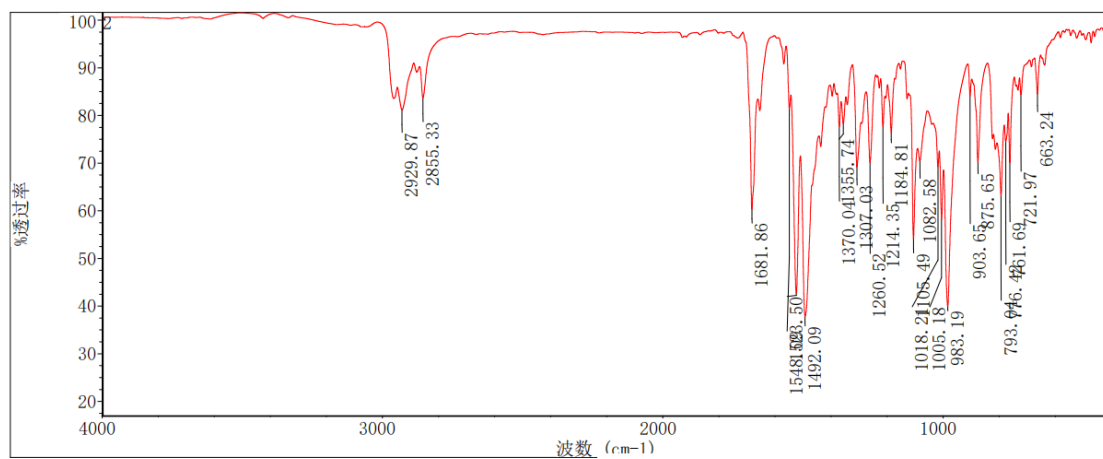

Figure S52. IR of compound NP-CHO.

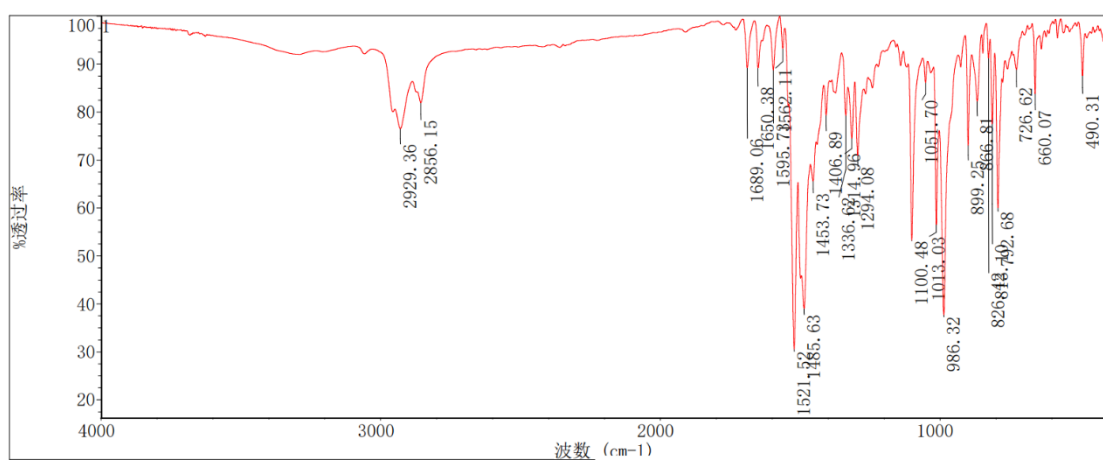

Figure S53. IR of compound PerNN.

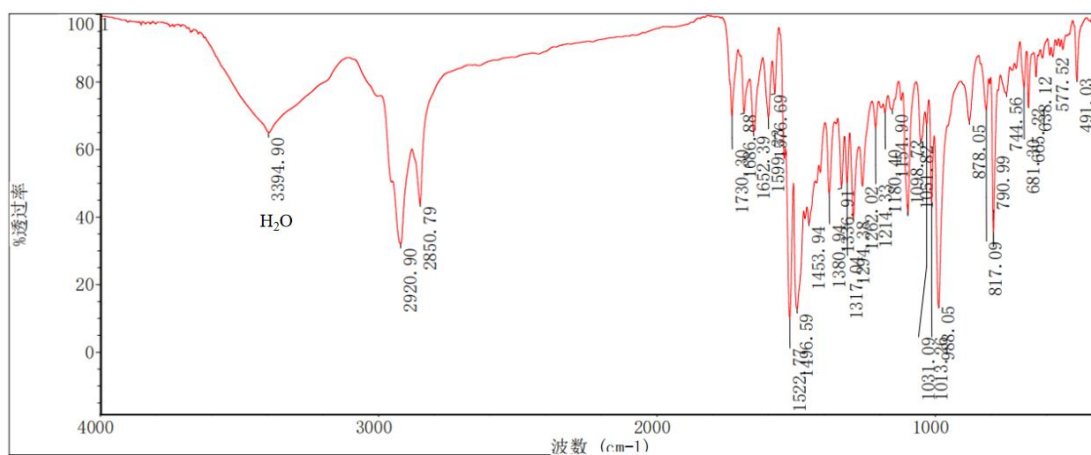

Figure S54. IR of compound PerNN-MeI.

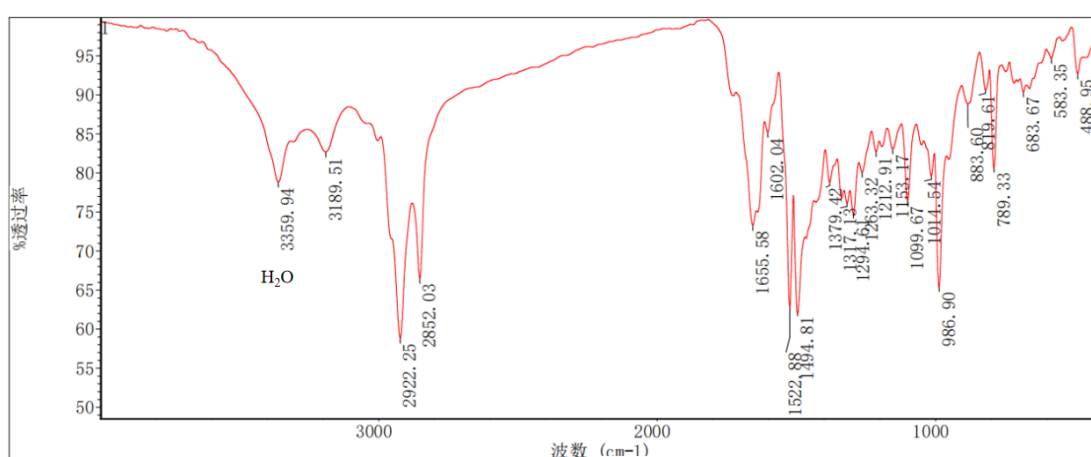

Figure S55. IR of compound PerNN-MeCl.

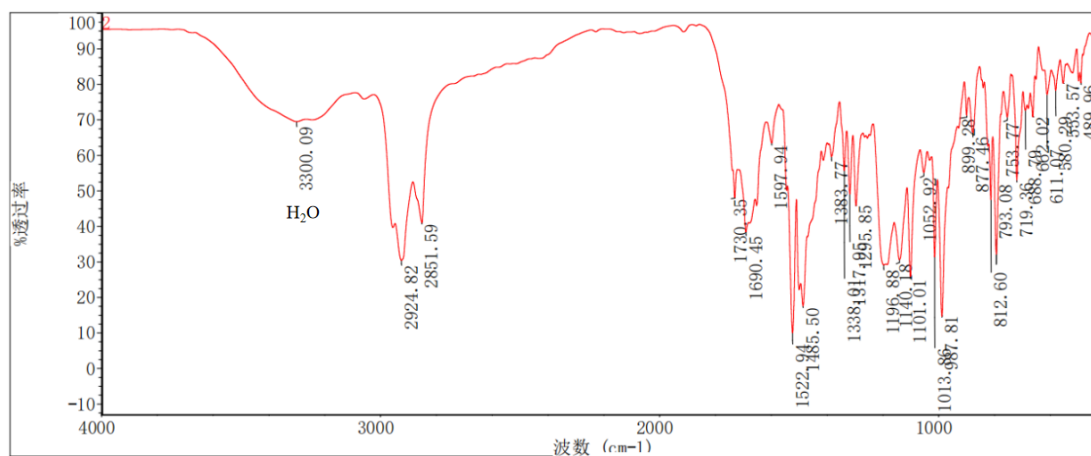

Figure S56. IR of compound PerNN-H.

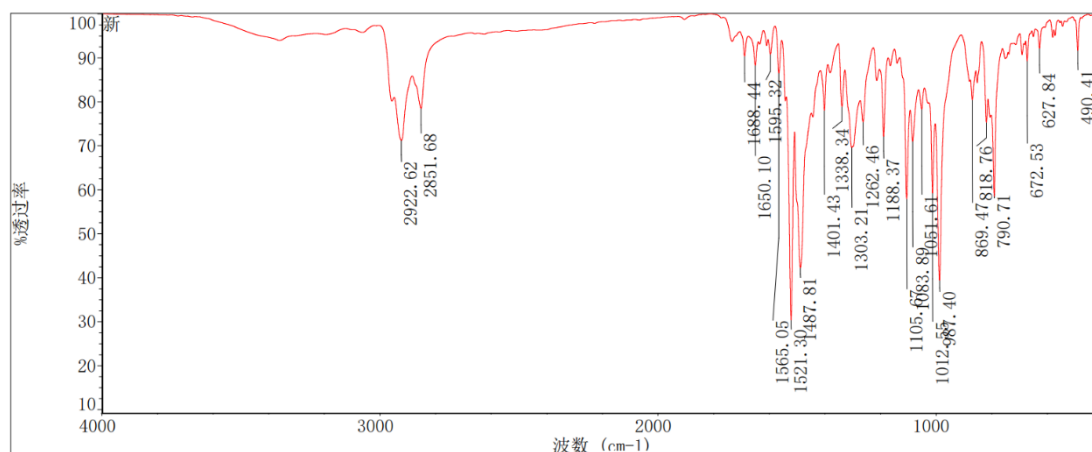

**Figure S57.** IR of compound **PerNN-O**.

## 7. Reference

- [1] Zhang, W., Liu, G., Cao, J., Chen, Y., Gao, L., Liu, G., Dai G. and Wang, Q., Synthesis and Properties of BN-embedded N-Perylene. *Chem. Asian J.*, **2022**, *17*, e202200340.
- [2] Frisch, M. J., Trucks, G. W., Schlegel, H. B., Scuseria, G. E., Robb, M. A., Cheeseman, J. R., Scalmani, G., Barone, V., Petersson, G. A., Nakatsuji, H., Li, X., Caricato, M., Marenich A. V., Bloino, J., Janesko, B. G., Gomperts, R., B. Mennucci, B., Hratchian, H. P., Ortiz, J. V., Izmaylov, A. F., Sonnenberg, J. L., Williams-Young, D., Ding, F., Lipparini, F., Egidi, F., Goings, J., Peng, B., Petrone, A., T. Henderson, T., Ranasinghe, D., Zakrzewski, V. G., Gao, J., Rega, N., Zheng, G., Liang, W., Hada, M., Ehara, M., Toyota, K., R. Fukuda, R., Hasegawa, J., Ishida, M., Nakajima, T., Honda, Y., Kitao, O., Nakai, H., Vreven, T., Throssell, K., Montgomery, J. A., Peralta, J. E., Ogliaro, F., Bearpark, M. J., Heyd, J. J., Brothers, E. N., Kudin, K. N., Staroverov, V. N., Keith, T. A., Kobayashi, R., Normand, J., Raghavachari, K., Rendell, A. P., Burant, J. C., Iyengar, S. S., Tomasi, J., Cossi, M., Millam, J. M., Klene, M., Adamo, C., Cammi, R., Ochterski, J. W., Martin, R. L., Morokuma, K., Farkas, O., Foresman, J. B. and Fox, D. J., Gaussian, Inc., Wallingford CT, **2016**.
- [3] Lu, T. and Chen, F. Multiwfn: A multifunctional wavefunction analyzer. *J. Comput. Chem.*, **2012**, *33*, 580.
- [4] Lu, T. and Chen, F. Quantitative analysis of molecular surface based on improved Marching Tetrahedra algorithm. *J. Mol. Graph. Model.*, **2012**, *38*, 314.
- [5] Humphrey, W., Dalke, A. and Schulten, K., VMD: visual molecular dynamics. *J. Mol. Graph.*, **1996**, *14*, 33.
- [6] Chen, Z., Wannere, C. S., Corminboeuf, C., Puchta, R., Schleyer, P. v. R. Nucleus-Independent Chemical Shifts (NICS) as an Aromaticity Criterion. *Chem. Rev.* **2005**, *105*, 3842.
- [7] Geuenich D, Hess K, Köhler F, Herges R. Anisotropy of the induced current density (ACID), a general method to quantify and visualize electronic delocalization. *Chem Rev.* **2005**, *105*, 3758.
